# Supplementary material for: Protocol for a prospective, observational, hospital-based multicentre study of nosocomial SARS-CoV-2 transmission: NOSO-COR Project
Source: PubMed Central journal article supplement — BMJ Open. 2020 Oct 22;10(10):e039088. doi: 10.1136/bmjopen-2020-039088 (PMC7582335; doi:10.1136/bmjopen-2020-039088), 2020-10-22
Supplement: bmjopen-2020-039088.draft_revisions.pdf [file bmjopen-2020-039088.draft_revisions.pdf]

# BMJ Open

BMJ Open is committed to open peer review. As part of this commitment we make the peer review history of every article we publish publicly available.

When an article is published we post the peer reviewers' comments and the authors' responses online. We also post the versions of the paper that were used during peer review. These are the versions that the peer review comments apply to.

The versions of the paper that follow are the versions that were submitted during the peer review process. They are not the versions of record or the final published versions. They should not be cited or distributed as the published version of this manuscript.

BMJ Open is an open access journal and the full, final, typeset and author-corrected version of record of the manuscript is available on our site with no access controls, subscription charges or pay-per-view fees (<http://bmjopen.bmj.com>).

If you have any questions on BMJ Open's open peer review process please email [info.bmjopen@bmj.com](mailto:info.bmjopen@bmj.com)

# BMJ Open

## Protocol for a multicentre study of nosocomial SARS-CoV2 transmission The NOSO-COR Project

|                               |                                                                                                                                                                                                                                                                                                                                                                                                                                                                                                                                                                                                                                                                                                                                                                                                                                                                                                                                                                                                                                                                                                                                                                                                                                                                                                                                                                                                                                                                                                                                                                                                                                                                                                                                                                                                                                                        |
|-------------------------------|--------------------------------------------------------------------------------------------------------------------------------------------------------------------------------------------------------------------------------------------------------------------------------------------------------------------------------------------------------------------------------------------------------------------------------------------------------------------------------------------------------------------------------------------------------------------------------------------------------------------------------------------------------------------------------------------------------------------------------------------------------------------------------------------------------------------------------------------------------------------------------------------------------------------------------------------------------------------------------------------------------------------------------------------------------------------------------------------------------------------------------------------------------------------------------------------------------------------------------------------------------------------------------------------------------------------------------------------------------------------------------------------------------------------------------------------------------------------------------------------------------------------------------------------------------------------------------------------------------------------------------------------------------------------------------------------------------------------------------------------------------------------------------------------------------------------------------------------------------|
| Journal:                      | <i>BMJ Open</i>                                                                                                                                                                                                                                                                                                                                                                                                                                                                                                                                                                                                                                                                                                                                                                                                                                                                                                                                                                                                                                                                                                                                                                                                                                                                                                                                                                                                                                                                                                                                                                                                                                                                                                                                                                                                                                        |
| Manuscript ID                 | bmjopen-2020-039088                                                                                                                                                                                                                                                                                                                                                                                                                                                                                                                                                                                                                                                                                                                                                                                                                                                                                                                                                                                                                                                                                                                                                                                                                                                                                                                                                                                                                                                                                                                                                                                                                                                                                                                                                                                                                                    |
| Article Type:                 | Protocol                                                                                                                                                                                                                                                                                                                                                                                                                                                                                                                                                                                                                                                                                                                                                                                                                                                                                                                                                                                                                                                                                                                                                                                                                                                                                                                                                                                                                                                                                                                                                                                                                                                                                                                                                                                                                                               |
| Date Submitted by the Author: | 06-Apr-2020                                                                                                                                                                                                                                                                                                                                                                                                                                                                                                                                                                                                                                                                                                                                                                                                                                                                                                                                                                                                                                                                                                                                                                                                                                                                                                                                                                                                                                                                                                                                                                                                                                                                                                                                                                                                                                            |
| Complete List of Authors:     | <p>Saadatian-Elahi, Mitra; Hospices Civils de Lyon, Hygiene, Epidemiology and Public Health; Laboratoire des Pathogènes Emergents, Fondation Mérieux, Centre International de Recherche en Infectiologie (CIRI), INSERM U1111, CNRS, Lyon, France</p> <p>Picot, Valentina; Fondation Merieux</p> <p>Hénaff, Laetitia; Fondation Mérieux, Centre International de Recherche en Infectiologie (CIRI), Inserm U1111, CNRS UMR5308, ENS de Lyon, France, Université de Lyon 1., Laboratoire des Pathogènes Emergents Pradel, Florence; Mérieux Foundation</p> <p>Escuret, Vanessa; Laboratoire de Virologie, Institut des Agents Infectieux, Hôpital de la Croix-Rousse, Hospices Civils de Lyon; Virpath - Grippe, de l'émergence au contrôle, Centre International de Recherche en Infectiologie (CIRI), Inserm U111, CNRS 5308, ENS, UCBL1, Faculté de Médecine RTH Laënnec</p> <p>Dananché, Cédric; Université de Lyon; Université Lyon 1; CNRS UMR 5558, Biométrie et Biologie Evolutive, Epidémiologie et Santé Publique, Lyon, France, Hospices Civils de Lyon, Hôpital Edouard Herriot, Service d'Hygiène, Epidémiologie et Prévention, Lyon, France</p> <p>Elias, Christelle; Laboratoire des Pathogènes Emergents, Fondation Mérieux, Centre International de Recherche en Infectiologie (CIRI), INSERM U1111, CNRS, Lyon, France; Service Hygiène, Epidémiologie et Prévention, Centre Hospitalier Edouard Herriot, Hospices Civils de Lyon</p> <p>Endtz, Hubert; Erasmus Medical Centre, Medical Microbiology &amp; Infectious Diseases; Fondation Mérieux,</p> <p>Vanhems, Philippe; Université de Lyon; Université Lyon 1; CNRS UMR 5558, Biométrie et Biologie Evolutive, Epidémiologie et Santé Publique, Lyon, France, Hospices Civils de Lyon, Hôpital Edouard Herriot, Service d'Hygiène, Epidémiologie et Prévention, Lyon, France</p> |
| Keywords:                     | <p>EPIDEMIOLOGY, Protocols &amp; guidelines &lt; HEALTH SERVICES ADMINISTRATION &amp; MANAGEMENT, INFECTIOUS DISEASES, Epidemiology &lt; INFECTIOUS DISEASES, Infection control &lt; INFECTIOUS DISEASES, Public health &lt; INFECTIOUS DISEASES</p>                                                                                                                                                                                                                                                                                                                                                                                                                                                                                                                                                                                                                                                                                                                                                                                                                                                                                                                                                                                                                                                                                                                                                                                                                                                                                                                                                                                                                                                                                                                                                                                                   |

1  
2  
3  
4  
5  
6  
7  
8  
9  
10  
11  
12  
13  
14  
15  
16  
17  
18  
19  
20  
21  
22  
23  
24  
25  
26  
27  
28  
29  
30  
31  
32  
33  
34  
35  
36  
37  
38  
39  
40  
41  
42  
43  
44  
45  
46  
47  
48  
49  
50  
51  
52  
53  
54  
55  
56  
57  
58  
59  
60

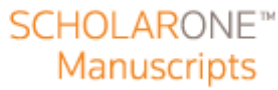

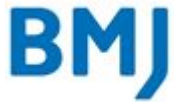

I, the Submitting Author has the right to grant and does grant on behalf of all authors of the Work (as defined in the below author licence), an exclusive licence and/or a non-exclusive licence for contributions from authors who are: i) UK Crown employees; ii) where BMJ has agreed a CC-BY licence shall apply, and/or iii) in accordance with the terms applicable for US Federal Government officers or employees acting as part of their official duties; on a worldwide, perpetual, irrevocable, royalty-free basis to BMJ Publishing Group Ltd ("BMJ") its licensees and where the relevant Journal is co-owned by BMJ to the co-owners of the Journal, to publish the Work in this journal and any other BMJ products and to exploit all rights, as set out in our [licence](#).

The Submitting Author accepts and understands that any supply made under these terms is made by BMJ to the Submitting Author unless you are acting as an employee on behalf of your employer or a postgraduate student of an affiliated institution which is paying any applicable article publishing charge ("APC") for Open Access articles. Where the Submitting Author wishes to make the Work available on an Open Access basis (and intends to pay the relevant APC), the terms of reuse of such Open Access shall be governed by a Creative Commons licence – details of these licences and which [Creative Commons](#) licence will apply to this Work are set out in our licence referred to above.

Other than as permitted in any relevant BMJ Author's Self Archiving Policies, I confirm this Work has not been accepted for publication elsewhere, is not being considered for publication elsewhere and does not duplicate material already published. I confirm all authors consent to publication of this Work and authorise the granting of this licence.

## Protocol for a multicentre study of nosocomial SARS-CoV2 transmission

### The NOSO-COR Project

Mitra Saadatian-Elahi,<sup>1,2</sup> Valentina Picot-Sanchez,<sup>1,3</sup> Laetitia Henaff,<sup>1</sup> Florence Pradel,<sup>1,3</sup>

Vanessa Escuret,<sup>4,5</sup> Cédric Dananché,<sup>1,2</sup> Christelle Elias,<sup>1,2</sup> Hubert Endtz,<sup>1,3</sup> Philippe

Vanhems<sup>1,2,6</sup>

<sup>1</sup> Laboratoire des Pathogènes Emergents, Fondation Mérieux, Centre International de

Recherche en Infectiologie (CIRI), INSERM U1111, CNRS, Lyon, France

<sup>2</sup> Service Hygiène, Epidémiologie et Prévention, Centre Hospitalier Edouard Herriot, Hospices

Civils de Lyon, Lyon, France

<sup>3</sup> Fondation Mérieux, France

<sup>4</sup> Laboratoire de Virologie, Institut des Agents Infectieux, Hôpital de la Croix-Rousse,

Hospices Civils de Lyon, Lyon, France

<sup>5</sup> Virpath - Grippe, de l'émergence au contrôle, Centre International de Recherche en

Infectiologie (CIRI), Inserm U111, CNRS 5308, ENS, UCBL1, Faculté de Médecine RTH

Laënnec, Lyon, France

<sup>6</sup> Inserm, F-CRIN, Lyon center of Innovative Clinical Research Network in Vaccinology

(I REIVAC), CIC 1417, Paris, France

### Correspondence to

Professor Philippe Vanhems

Groupement Hospitalier Centre, Unité d'Hygiène, Epidémiologie, Prévention - Bâtiment 1

5, place d'Arsonval-69437 Lyon cedex 3

Phone: +33 4 72 11 07 20

Fax: +33 4 72 11 07 26

E-mail: [Philippe.vanhems@chu-lyon.fr](mailto:Philippe.vanhems@chu-lyon.fr)

## Abstract

**Introduction:** The newly identified SARS-CoV2 can cause serious acute respiratory infections such as pneumonia with a mortality rate of approximately 2% to 4%. In the current context of high incidence rates of SARS-CoV2 in the community, a significant increase in the rate of nosocomial transmission is expected. The risk of nosocomial transmission could even be higher in low-income countries that have fragile healthcare systems. This protocol is intended to study and document suspected or confirmed cases of nosocomial SARS-CoV2 infection, the clinical spectrum and the determinants (risk factors/protective) at participating hospitals.

**Methods and analysis:** This will be an international multicentre prospective, observational, hospital-based study in adults and children. It will include volunteer patients, care givers and healthcare professionals in France and hospitals affiliated with the GABRIEL network. Demographic and clinical data will be collected using case-report forms designed especially for the purpose of the project. A nasopharyngeal swab will be collected and tested for SARS-CoV2 by RT-PCR. Characteristics of the study participants, the proportion of confirmed nosocomial SARS-CoV2 infections relative to all patients with syndromes suggestive of 2019-nCoV infection will be analysed. Appropriate multivariate modelling will be used to identify the determinants associated with nosocomial onset.

**Ethics and dissemination:** This study was approved by the clinical research and committee of Ile de France V on March 8, 2020.

**Registration details:** The trial was registered in ClinicalTrials (NCT04290780).

**Key words:** SARS-CoV2; nosocomial transmission, Multicentre prospective, France, Gabriel Network

**Word count:** 3523

## Strengths and limitations of the study

➤ This prospective study will generate and evaluate original data on nosocomial SARS-CoV2 infection in France and in the low-income countries of the GABRIEL network using the same protocol and standardised CRF.

➤ The results will provide the opportunity to compare the management of nosocomial Covid-19 infection in different settings for mutual exchanges and optimisation.

➤ The results will make it possible to refine the definition of nosocomial SARS-CoV2 infection, strengthen preventive campaigns for in-hospital transmission of SARS-CoV2 and pave the way for new recommendations in terms of preventive measures.

➤ Selection bias owing to access to care in different populations and bias owing to the extent of access to personal protective equipment, in particular, in low-income countries may occur.

➤ The non-exhaustivity of the confounders to be collected should be considered for interpretation of the results.

## INTRODUCTION

Coronaviruses are enveloped viruses that mainly infect the upper digestive and respiratory tracts of mammals and birds. In humans, the viruses can cause mild respiratory infections but can also lead to serious infections such as pneumonia. During the past decade, two human coronaviruses SARS-CoV and MERS-CoV were the source of severe acute respiratory syndrome (SARS) and Middle East respiratory syndrome (MERS) epidemics in 2002 and 2012 respectively.<sup>1</sup>

The newly identified SARS-CoV2 is a single-stranded RNA virus belonging to the coronavirus crown virus family of the subfamily Orthocoronaviridae. SARS-CoV2 appears to be a recombinant virus between the bat coronavirus and a coronavirus of unknown origin.<sup>2</sup> The virus was first detected in December 2019 in Hubei province of China<sup>3-5</sup> and spread widely throughout China before crossing the borders into other countries.<sup>6</sup> SARS-CoV2 is mainly transmitted by respiratory droplets but can also be spread through aerial droplets and contact.<sup>7</sup>

Covid-19 is the emerging infectious disease due to SARS-CoV2. The clinical features of Covid-19 are lower respiratory infection<sup>8</sup> with a mortality rate of approximately 2% to 4%,<sup>9</sup> but asymptomatic cases have also been reported.<sup>10</sup> The estimated median incubation period of COVID-19 was 5.1 days (CI, 4.5 to 5.8 days) in a pooled analysis of 181 confirmed cases reported from around the world.<sup>11</sup>

On March 11, 2020, the World Health Organization (WHO) declared Covid-19 a pandemic, pointing to the over 118,000 cases of coronavirus in over 110 countries and territories around the world with the sustained risk of further global spread.

Analysis of the clinical presentation of the first case series (n=41) showed that 31% of the patients were admitted to intensive care units (ICU) and the crude mortality rate was 15%.<sup>12</sup>



1  
2  
3 COVID-19 related complications including severe pneumonia, respiratory distress, secondary  
4 bacterial infection, or decompensation for chronic heart or respiratory disease, mainly  
5 affected patients over 65. The cases described to date mostly occurred among patients with  
6 a history of chronic pathology,<sup>4, 12</sup> who were therefore more likely to be hospitalised.  
7  
8  
9  
10  
11

12  
13 In the absence of a preventive vaccine or curative treatment, current efforts to prevent  
14 and control the spread of SARS-CoV2 are based on early detection of cases along with infection  
15 control measures such as droplet-type and contact-type precautions. In addition, specific  
16 control measures are being applied to patients who should be cared for in single rooms if possible,  
17 wear surgical masks and practice strict hand hygiene using hydroalcoholic solutions. Specific  
18 recommendations have also been issued from the WHO and Centers for Disease Control.<sup>13, 14</sup>  
19  
20  
21  
22  
23  
24  
25  
26  
27

28 As for the SARS and MERS-CoV epidemics and other respiratory viruses such as influenza  
29 or respiratory syncytial virus (RSV), cases of intra-hospital transmission of SARS-CoV2 have  
30 been reported and are going to continue to occur. In Wuhan alone, 1,080 healthcare  
31 professionals (HCP) were infected.<sup>15</sup> In China, more than 3,300 HCP were infected as of early  
32 March and in Italy, 20% of the HCP participating in a survey reported Covid-19 infections.<sup>16</sup>  
33  
34  
35  
36  
37  
38  
39

40 HCP have a key position in the transmission process because they are exposed to both  
41 community-acquired and nosocomial cases.<sup>17, 18</sup> This risk is amplified when the incidence of  
42 the infection in the community is high. In the current context of high incidence rates of SARS-  
43 CoV2 in the community, a significant increase in the rate of nosocomial transmission is  
44 therefore expected. The risk of nosocomial transmission would be even higher in low-income  
45 countries owing to several factors such as the delay in diagnosis of Covid-19 patients, and the  
46 lack of infrastructure, trained personnel, isolation units, and infection control programs.  
47  
48  
49  
50  
51  
52  
53  
54  
55  
56  
57  
58  
59  
60

1  
2  
3 Beyond the morbidity and mortality associated with nosocomial Covid-19 infection, the  
4 impact on the organisation of care and the additional costs caused by longer hospital stays are  
5 still unknown, but will certainly be of consequence.  
6  
7  
8  
9

10 The link between hospital (nosocomial) and community attack rates is a good indicator  
11 of the effect of hospitalisation on the transmission of respiratory viruses.<sup>19</sup>  
12  
13

14 Better understanding of the transmission chains of SARS-CoV2 and the impact of control  
15 measures in healthcare units is essential to achieving control of the pandemic. For example,  
16 the configuration of care units also appears to play a role in transmission. Indeed,  
17 hospitalisation in a double room increased the risk of contracting influenza in a hospital by  
18 2.67-fold.<sup>20</sup>  
19  
20  
21  
22  
23  
24  
25  
26

27 Description and implementation of appropriate hygiene and preventive measures play a  
28 decisive role in the control of nosocomial risk and are a major determinant of our ability to  
29 understand nosocomial dissemination of this emerging virus. These preventive measures  
30 should be included in appropriate hospital guidelines to control nosocomial risk.  
31  
32  
33  
34  
35  
36

37 The present manuscript describes the protocol of an international multicentre  
38 prospective study whose aims are to document suspected or confirmed nosocomial cases of  
39 Covid-19, their clinical spectrum and the determinants at participating hospitals.  
40  
41  
42  
43

#### 44 **Objectives**

45 The principal aim of this study is to estimate the prevalence and incidence of suspected or  
46 confirmed cases of SARS-CoV2 infection among HCP, patients, and caregivers (CG).  
47  
48  
49  
50

51 A caregiver is defined as a family member or authorized guardian who regularly looks  
52 after the patient during his or her hospital stay and lives in the same household. The concept  
53 of including CG is of particular interest especially in low-income countries where  
54 parents/family members are the main source of support for their sick relatives.  
55  
56  
57  
58  
59  
60

1  
2  
3 The secondary objectives are to 1) to describe and document cases of community-  
4 acquired SARS-CoV2 infection (prevalent cases on hospital admission) likely to be the source  
5 of nosocomial infection and the clinical spectrum; 2) describe and document hospital-acquired  
6 SARS-CoV2 infection (incident cases) that may be the source of nosocomial transmission and  
7 their clinical spectrum; 3) describe infection control practices implemented during the  
8 occurrence of hospital cases of SARS-CoV2 and relate these practices to the attack rates of  
9 nosocomial SARS-CoV2 infection; 4) estimate the incidence of infectious syndromes attributed  
10 to SARS-CoV2 and the proportion of severe cases, including deaths; 5) describe  
11 subpopulations with SARS-CoV2 infection depending on the hospital ward (for example:  
12 internal medicine vs. surgery vs. intensive care units [ICU]); 6) compare the adjusted attack  
13 rates of nosocomial and community-acquired SARS-CoV2 infection to identify contextual  
14 and/or environmental protective and risk factors in both the hospital and community setting;  
15 7) calculate the crude mortality rate and adjusted rates according to specific clinical features.  
16  
17  
18  
19  
20  
21  
22  
23  
24  
25  
26  
27  
28  
29  
30  
31  
32  
33  
34

## 35 **METHODS**

### 36 **Study design and setting**

37  
38 This prospective, observational, hospital-based study will be carried out among volunteers,  
39 patients, CG and HCP in university-affiliated hospitals (Lyon, France) and hospitals affiliated  
40 with the GABRIEL network (<https://www.gabriel-network.org/>), a network of research  
41 institutions mainly located in low-income countries and focused on the etiological agents of  
42 pneumonia. Other French or European university hospitals will be welcome and able to join  
43 the project on a voluntary basis.  
44  
45  
46  
47  
48  
49  
50  
51  
52  
53

### 54 **Recruitment**

55  
56 The study flow chart is shown in Figure 1. Eligible patients will be identified by a clinical  
57 research assistant who will regularly contact hospital wards (emergency, geriatric, infectious  
58  
59  
60

1  
2  
3 diseases, etc.) and will review the results of the virology laboratory. The clinical research  
4  
5 assistant will meet eligible individuals to explain the purpose of the study and obtain written  
6  
7 informed consent. Nosocomial cases will be defined as infected patients hospitalised for more  
8  
9 than 48 hours.  
10  
11

12  
13 Identification of infected HCP will be based on data from the department of occupational  
14  
15 medicine. A confidential interview with the symptomatic HCP will be organized to describe  
16  
17 the purpose of the study and obtain written informed consent.  
18  
19

20  
21 Identification of infected CG will be based on self-reporting. During their visits to the  
22  
23 hospital, CG will be informed about the study and will be asked to report to the study team in  
24  
25 case of symptoms suggestive of Covid-19.  
26  
27

28 **Inclusion criteria:** Any adult/child patient, CG or HCP from participating hospitals who  
29  
30 presents an infectious syndrome based on the WHO definition of Covid-19.<sup>21</sup>  
31  
32

33 **Exclusion criteria:** Individuals who do not meet the above criteria.  
34

35 **Participant timeline:** Enrolled participants will be followed up during their entire hospital stay  
36  
37 and for a period of 30 days after discharge. Information on further complications occurred  
38  
39 during the follow-up period and vital status will be collected from the patient's medical file.  
40  
41

42 **Index case:** An index case is defined as the first confirmed case of SARS-CoV2 infection in a  
43  
44 given department during a given period.  
45  
46

47 **Secondary case:** A secondary case is defined as a patient i) who is in contact with an index  
48  
49 case during the contagious period, currently defined as 5 days before and 15 days after the  
50  
51 start of symptoms in the index case; ii) who develops clinical features compatible with the  
52  
53 diagnostic criteria of SARS-CoV2 infection within 15 days of the onset of symptoms in the index  
54  
55 case; and iii) if possible, a positive RT-PCR for the index case.  
56  
57  
58  
59  
60

1  
2  
3 The period of detection of secondary cases will be calculated according to the period of  
4 contagiousness of the index case: [date of onset of symptoms] to [date of onset of symptoms  
5 + 15 days] and the incubation period of secondary cases (1 to 15 days). Secondary cases will  
6 therefore be clinically detected in the time interval between [start date of symptoms in the  
7 index case + 1 day] to [start date of symptoms in the index case +15 days].  
8  
9  
10  
11  
12  
13  
14

15 **Figure 1:** Study flow chart  
16  
17  
18  
19  
20

## 21 **Data collection**

### 22 **Clinical data**

23  
24 Data will be collected using case-report forms (CRF) designed especially for the purpose of this  
25 project for patients, CG, and HCP. According to the operating modes of each participating  
26 hospital and their organization in terms of clinical or epidemiological research, the CRF will be  
27 completed during a face-to-face interview and the use of medical records.  
28  
29  
30  
31  
32  
33  
34

35 All three CRF will include demographic characteristics, underlying comorbidities, medical  
36 history, clinical, biological and laboratory data on the SARS-CoV2 infectious episode. In case  
37 of HCP or CG hospitalisation, a patient's CRF including additional data regarding information  
38 on hospitalisation (ward specialty, type of room, etc.) and biological parameters (blood cell  
39 counts, etc.) will be completed.  
40  
41  
42  
43  
44  
45  
46  
47

48 The characteristics of the hospital and participating services (specialties, number of beds,  
49 number of nurses and doctors, presence of an infection control unit, etc.) and infection control  
50 policies regarding the risk of infection by SARS-CoV2 will also be collected.  
51  
52  
53  
54

### 55 **Biological Sample collection and testing**

56  
57 These diagnostics will be enabled only at sites that have the capacity for testing or at sites  
58 where the capacity can be reached.  
59  
60

1  
2  
3 A nasopharyngeal swab will be collected and tested for the presence of SARS-CoV2  
4  
5 ribonucleic acid (RNA) by Real-Time Reverse Transcription Polymerase Chain Reaction (RT-  
6  
7 PCR) for each patient, CG, or HCP that meets inclusion criteria. Samples will be tested by the  
8  
9 closest virology laboratory where state-of-the-art SARS-CoV2 assay is performed. The results  
10  
11 will be reported on laboratory forms created specifically for this study.  
12  
13

14  
15 If feasible, RT-PCR will be performed to detect a panel of other respiratory viruses  
16  
17 (influenza A and B, RSV, rhinovirus, metapneumovirus, etc.) depending on the diagnostic  
18  
19 practices available at each participating centre. Furthermore, SARS-CoV2 sequencing will be  
20  
21 performed depending on the technical platforms available.  
22  
23

24  
25 Biobanks are expected to be constituted and if possible, an aliquot of each sample will  
26  
27 be stored in a Micronic tube at -20°C for at least 5 years after written informed consent is  
28  
29 obtained.  
30  
31

## 32 **Statistical methods**

### 33 **Sample size**

34  
35 Given the descriptive nature and surveillance objectives of this observational study, reaching  
36  
37 a predefined number of subjects is not realistic.  
38  
39

### 40 **Statistical analyses**

41  
42 Data will be analysed using statistical methods to describe the characteristics of the healthcare  
43  
44 setting and study participants, the percentage of Covid-19 of those presenting influenza-like  
45  
46 illnesses, the percentage of nosocomial Covid-19 patients among the confirmed cases, etc.  
47  
48  
49

50  
51 The primary criteria will be the proportion of patients, CG and HCP with confirmed  
52  
53 nosocomial SARS-CoV2 infection relative to all patients, CG and HCP with syndromes  
54  
55 suggestive of 2019-nCoV infection during the study period.  
56  
57  
58  
59  
60

1  
2  
3 Secondary outcome criteria will be to i) describe the delay of onset of suspected or  
4 confirmed nosocomial Covid-19 infection for hospitalised patients; ii) estimate the attack rate  
5 of confirmed Covid-19 cases in hospitalised patients according to their length of stay; and iii)  
6 estimate the attack rate of confirmed Covid-19 cases among CG and HCP.  
7  
8  
9  
10  
11

12  
13 Appropriate multivariate modelling methods will be applied depending on the numbers  
14 of patients and the hypothesis tested (Poisson regression, Cox regression, logistic regression)  
15 to identify the determinants independently associated with outcomes. For example, the  
16 length of stay will be considered as the duration of exposure.  
17  
18  
19  
20  
21  
22

## 23 **Data management and archiving**

### 24 **Case Report Form**

25  
26 All required information will be recorded on a paper-based CRF in a clear and legible manner  
27 and justification must be provided for all missing data. Erroneous data noted in the CRF will  
28 be clearly crossed out and the correct data will be written next to the crossed-out information,  
29 accompanied by the initials of the investigator or authorized person who made the correction,  
30 the date and, if possible, and a justification for the correction.  
31  
32  
33  
34  
35  
36  
37  
38  
39

40 To reduce data-entry errors by predefining plausibility checks and facilitate the rapid  
41 transfer of data, the electronic CRF (e-CRF) version of the study CRF will also be available.  
42  
43  
44

45 Transfer of the data to the coordinating centre in Lyon (France) will be performed via the  
46 e-CRF following approval by the French “**Commission nationale de l'informatique et des**  
47 **libertés (CNIL) - National Commission for Data Protection**”. An alternative possibility will be  
48 to ensure periodic reporting (every 10 inclusions) by e-mailing the scan of the completed CRF  
49 to the coordinating centre.  
50  
51  
52  
53  
54  
55  
56  
57  
58  
59  
60

## Data management

Collected data will be computerised in the coordinating centre in Lyon, France. Source documents and databases will be anonymous and locked with a password known only to the scientific staff. These data will be kept for a minimum of 10 years after the end of the study.

## Archiving

According to French law, the sponsor will keep the study documents (protocol and annexes, possible amendments, information forms, CRF, statistical analysis plan and output and the final study report) for a minimum of 25 years. After this period, the sponsor will be consulted before any data is destroyed.

Study-related documents and reports may be subject to audit or inspection by the sponsor and/or other authorized bodies.

This study is part of the "Reference Methodology" (MR-003) in application of article 54, paragraph 5 of French law N°78-17 of January 6, 1978. This change was approved on January 5, 2006 and modified on July 21, 2016. The Hospices Civils de Lyon, the promoter of the study, has signed a commitment to comply with this "Reference Methodology".

## Rights to access source documents

Source documents are defined as any original documents, data, records in which data collected for a clinical trial is first recorded. Source documents will be kept by the investigator for 10 years or, if hospital medical records, by the hospital for 10 years. Each centre will have access to its own data during the study.

To ensure quality control and auditing, the sponsor will be responsible for obtaining the agreement of all parties involved in the research to guarantee direct access to all places where the research is carried out and to source data, documents and reports.



1  
2  
3 In accordance with current laws and regulations (articles L.1121-3 and R.5121-13 of the  
4 French public health code), all documents and personal data required for monitoring, quality  
5 control or auditing will be available to the persons in charge of these activities.  
6  
7  
8  
9

### 10 **Confidentiality**

11  
12 The principal and associate investigators are required to respect professional confidentiality  
13 (articles 226-13 and 226-14 of the French Penal Code). In accordance with French laws  
14 regarding the confidentiality of study participant personal data (article L.1121-3 of the French  
15 Public Health Code) and clinical/laboratory results obtained throughout the study (article R.  
16 5121-13 of the French Public Health Code), individuals with direct access to the data will take  
17 all necessary precautions to ensure the confidentiality of the overall collected information.  
18  
19  
20  
21  
22  
23  
24  
25  
26

27 All personal data concerning study participants will remain strictly confidential. To  
28 respect privacy, all participant details will be anonymous for the purpose of database  
29 preparation. Study subjects will be coded as follows: AAXXXZZYY. The first two letters will be  
30 either PA for a patient, CG for caregiver and HP for HCP. The following four digits will depend  
31 on the order of inclusion of the case and the next two letters will correspond to the hospital  
32 code. Finally, the last two letters will correspond to the country in which the hospital is  
33 located.  
34  
35  
36  
37  
38  
39  
40  
41  
42  
43  
44

### 45 **Quality control and assurance**

46  
47 Quality assurance audits will be carried out by persons appointed by the promoter as well as  
48 the inspections carried out by the Competent Authorities. All data, documents and reports  
49 can be subject to regulatory audits and inspections without hindering medical confidentiality.  
50  
51  
52  
53  
54  
55  
56  
57  
58  
59  
60

## **Ethics and dissemination**

### **Ethical approval**

The protocol, information notice, and CRF will be submitted to the ethics committee of each participating hospital for approval.

### **Informed consent**

Patients, CG and HCP will be informed of the objectives and their rights to refuse to participate in the study or withdraw at any time using simple, understandable terms. This information will be provided by an information and consent form given to each participant. According to French law, voluntary, oral informed consent will be obtained by the investigator before inclusion for the epidemiological data while signed consent is needed for the collection of biological banks. Consenting will be performed following the country's ethical guidelines. Informed consent will be obtained from the parents of included children (<18 years old).

### **Regulatory compliance**

The research will be conducted in accordance with applicable laws and regulations currently in place in France and internationally.

### **Withdrawal criteria**

Subjects may request to withdraw from the study at any time and for any reason without having to justify. In the event of a premature withdrawal, the investigator must document the participant's reasons for withdrawal as completely as possible.

### **Stopping the research study**

The sponsors reserve the right to interrupt the study at any time if the objectives are not being met. In the event of premature termination of the study for security reasons, the information will be transmitted by the sponsors to all concerned parties and to the local ethical committee within 15 days.

### Protocol amendments

In the eventuality of changes in the existing protocol that significantly affect the scope or the scientific quality of the investigation, an amendment containing a verbatim description of the changes and reference (date and number) to the submission that contained the original protocol will be submitted to the ethical committee for their approval.

### Dissemination

Communications and scientific reports that emerge from this study will be carried out under the responsibility of the principal investigator in agreement with the associated investigators. Publication rules will follow international recommendations.<sup>22</sup> The findings will also be shared with national health authorities.

Reporting will follow the guidelines in the Consolidated Standards of Reporting Trials (CONSORT) Statement.<sup>23</sup> Authorship will follow the guidelines established by the International Committee of Medical Journal Editors (<http://www.icmje.org/>) which require substantive contributions to the design, conduct, interpretation, and reporting of a trial.

### Discussion

Human-to-human transmission of SARS-CoV2, including nosocomial transmission, is now well documented. The risk of amplification of spread of the disease in healthcare facilities is strong in case of a lack of infection control measures. Early recognition of nosocomial Covid-19 infection in patients or HCP is therefore essential for the setting up of immediate investigation and implementation of appropriate hygiene measures. Describing the signs and symptoms associated with nosocomial Covid-19 will enable comparisons with existing data on other nosocomial viral respiratory infections (i.e. influenza, respiratory syncytial virus, SARS-CoV, MERS-CoV).

1  
2  
3 The prospective design and face-to-face interviews will make it possible to reduce recall  
4 bias and to collect accurate data. The expertise of French university affiliated hospitals is  
5 already strongly involved in the surveillance of nosocomial infections and the extensive  
6 experience of GABRIEL network countries in various research studies related to respiratory  
7 infections also strengthen this research project. Participation in this project will enable the  
8 subjects to benefit from the diagnostic results. Moreover, each centre will benefit from the  
9 overall data in order to explore a particular scientific theme.

10  
11  
12  
13  
14  
15  
16  
17  
18  
19  
20 The results of the NOSO-COR project will provide original results that could: 1) constitute  
21 additional evidence for a better understanding of the duration of the incubation and  
22 contagious period of SARS-CoV2; 2) make it possible to refine the definition of nosocomial  
23 SARS-CoV2 infection; 2) strengthen preventive campaigns for in-hospital transmission of  
24 SARS-CoV2; 3) pave the way for new recommendations in terms of preventive measures; 4)  
25 supplement existing recommendations by acquiring additional data concerning the  
26 transmission of the virus and thereby contribute to improving control guidelines for similar  
27 respiratory viral epidemics.

28  
29  
30  
31  
32  
33  
34  
35  
36  
37  
38  
39  
40  
41  
42  
43  
44  
45  
46  
47  
48  
49  
50  
51  
52  
53  
54  
55  
56  
57  
58  
59  
60  
Communication of the results of this study could raise awareness among HCP and CG vis-  
à-vis their roles in preventing the spread of the virus in hospitals and in their immediate  
surroundings and could be used to support vaccination coverage should a vaccine become  
available in the future. The contribution of strain genotyping, when this data becomes  
available on a large scale, could complement epidemiological investigations targeting  
nosocomial transmission of Covid-19.<sup>24</sup>

Asymptomatic cases will not be included in this study although SARS-CoV2 transmission from  
asymptomatic cases has been documented.<sup>25</sup> Furthermore, there is a risk of missing even  
symptomatic cases owing to the intensity of the outbreak.

## References

1. de Wit E, van Doremalen N, Falzarano D, et al. SARS and MERS: recent insights into emerging coronaviruses. *Nat Rev Microbiol*. 2016;14(8):523–534.  
doi:10.1038/nrmicro.2016.81
2. Ji W, Wang W, Zhao X, et al. Homologous recombination within the spike glycoprotein of the newly identified coronavirus may boost cross-species transmission from snake to human. *J Med Virol*. 2020;10.1002/jmv.25682. doi: 10.1002/jmv.25682.
3. Hui DS, I Azhar E, Madani TA, et al. The continuing 2019-nCoV epidemic threat of novel coronaviruses to global health - The latest 2019 novel coronavirus outbreak in Wuhan, China. *Int J Infect Dis*. 2020; 91:264-266. doi: 10.1016/j.ijid.2020.01.009.
4. Zhu N, Zhang D, Wang W, et al; China Novel Coronavirus Investigating and Research Team. A Novel Coronavirus from Patients with Pneumonia in China, 2019. *N Engl J Med*. 2020. doi: 10.1056/NEJMoa2001017.
5. Lu H, Stratton CW, Tang YW. Outbreak of Pneumonia of Unknown Etiology in Wuhan China: the Mystery and the Miracle. *J Med Virol*. 2020;10.1002/jmv.25678. doi: 10.1002/jmv.25678.
6. Li R, Pei S, Chen B, et al. Substantial undocumented infection facilitates the rapid dissemination of novel coronavirus (SARS-CoV2) [published online ahead of print, 2020 Mar 16]. *Science*. 2020; eabb3221. doi:10.1126/science.abb3221
7. Jin YH, Cai L, Cheng ZS, et al. A rapid advice guideline for the diagnosis and treatment of 2019 novel coronavirus (2019-nCoV) infected pneumonia (standard version). *Mil Med Res*. 2020;7(1):4. doi:10.1186/s40779-020-0233-6.
8. Lupia T, Scabini S, Pinna SM, et al. 2019-novel coronavirus outbreak: A new challenge. *J Glob Antimicrob Resist*. 2020. pii: S2213-7165(20)30050-3. doi: 10.1016/j.jgar.2020.02.021.

- 1  
2  
3 9. Perlman S. Another Decade, Another Coronavirus. *N Engl J Med*. 2020. doi:  
4  
5 10.1056/NEJMe2001126.  
6  
7  
8 10. Hu Z, Song C, Xu C, et al. Clinical characteristics of 24 asymptomatic infections with  
9  
10 COVID-19 screened among close contacts in Nanjing, China. *Sci China Life Sci*. 2020. doi:  
11  
12 10.1007/s11427-020-1661-4.  
13  
14  
15 11. Lauer SA, Grantz KH, Bi Q, et al. The Incubation Period of Coronavirus Disease 2019  
16  
17 (COVID-19) From Publicly Reported Confirmed Cases: Estimation and Application. *Ann Intern*  
18  
19 *Med*. 2020. doi: 10.7326/M20-0504.  
20  
21  
22 12. Huang C, Wang Y, Li X, et al. Clinical features of patients infected with 2019 novel  
23  
24 coronavirus in Wuhan, China. *Lancet*. 2020; S0140-6736(20)30183-5. doi: 10.1016/S0140-  
25  
26 6736(20)30183-5.  
27  
28  
29 13. Centre for Disease Control. Interim Infection Prevention and Control Recommendations  
30  
31 for Patients with Known or Patients Under Investigation for 2019 Novel Coronavirus (2019-  
32  
33 nCoV) in a Healthcare Setting. [https://www.cdc.gov/coronavirus/2019-nCoV/hcp/infection-](https://www.cdc.gov/coronavirus/2019-nCoV/hcp/infection-control.html)  
34  
35 [control.html](https://www.cdc.gov/coronavirus/2019-nCoV/hcp/infection-control.html)  
36  
37  
38  
39 14. World Health Organisation. Infection prevention and control during health care when  
40  
41 novel coronavirus (nCoV) infection is suspected Interim guidance 25 January 2020.  
42  
43 WHO/2019-nCoV/IPC/v2020.2.  
44  
45  
46 15. Wang D, Hu B, Hu C, et al. Clinical Characteristics of 138 Hospitalized Patients With 2019  
47  
48 Novel Coronavirus-Infected Pneumonia in Wuhan, China [published online ahead of print,  
49  
50 2020 Feb 7]. *JAMA*. 2020; e201585. doi:10.1001/jama.2020.1585  
51  
52  
53  
54 16. COVID-19: protecting health-care workers. The Lancet Editorial. [www.thelancet.com](http://www.thelancet.com) Vol  
55  
56 395 March 21, 2020. [https://doi.org/10.1016/S0140-6736\(20\)30644-9](https://doi.org/10.1016/S0140-6736(20)30644-9)  
57  
58  
59  
60

- 1  
2  
3 17. Voirin N, Payet C, Barrat A, et al. Combining high-resolution contact data with virological  
4 data to investigate influenza transmission in a tertiary care hospital. *Infect Control Hosp*  
5  
6 *Epidemiol.* 2015;36(3):254-260.  
7  
8  
9  
10 18. Vanhems P, Barrat A, Cattuto C, et al. Estimating potential infection transmission routes  
11 in hospital wards using wearable proximity sensors. *PLoS One.* 2013;8(9):e73970. doi:  
12 10.1371/journal.pone.0073970. Erratum in: *PLoS One.* 2013;8(9).  
13  
14  
15 19. Vanhems P, Voirin N, Bénet T, et al. Detection of Hospital Outbreaks of Influenza-Like  
16  
17  
18  
19  
20  
21  
22  
23  
24  
25  
26  
27  
28  
29  
30  
31  
32  
33  
34  
35  
36  
37  
38  
39  
40  
41  
42  
43  
44  
45  
46  
47  
48  
49  
50  
51  
52  
53  
54  
55  
56  
57  
58  
59  
60
20. World Health Organisation. Coronavirus disease 2019 (COVID-19) Situation Report – 70. Page 9. [https://www.who.int/docs/default-source/coronaviruse/situation-reports/20200330-sitrep-70-covid-19.pdf?sfvrsn=7e0fe3f8\\_2](https://www.who.int/docs/default-source/coronaviruse/situation-reports/20200330-sitrep-70-covid-19.pdf?sfvrsn=7e0fe3f8_2)
21. Munier E, Bénet T, Régis C, et al. Hospitalisation in double-occupancy rooms and the risk of hospital-acquired influenza: a prospective cohort study, *Clinical Microbiology and Infection* 2016, doi: 10.1016/j.cmi.2016.01.010.
22. International Committee of Medical Journal Editors. Uniform requirements for manuscripts submitted to biomedical journals. *N Engl J Med.* 1997;336(4):309–315. doi:10.1056/NEJM199701233360422
23. Campbell MK, Piaggio G, Elbourne DR, et al. Consort 2010 statement: extension to cluster randomised trials. *BMJ.* 2012; 345:e5661. doi:10.1136/bmj.e5661
24. Chen Y, Liu Q, Guo D. Coronaviruses: genome structure, replication, and pathogenesis. *J Med Virol.* 2020;10.1002/jmv.25681. doi: 10.1002/jmv.25681.

1  
2  
3 25. Tian S, Hu N, Lou J, et al. Characteristics of COVID-19 infection in Beijing. *J Infect.*  
4  
5 2020;80(4):401–406. doi:10.1016/j.jinf.2020.02.018.  
6  
7  
8  
9  
10  
11  
12  
13  
14  
15  
16  
17  
18  
19  
20  
21  
22  
23  
24  
25  
26  
27  
28  
29  
30  
31  
32  
33  
34  
35  
36  
37  
38  
39  
40  
41  
42  
43  
44  
45  
46  
47  
48  
49  
50  
51  
52  
53  
54  
55  
56  
57  
58  
59  
60

For peer review only



## Acknowledgment

The authors thanks M. Peter Tucker for editing the manuscript.

## Author contributions

PV designed the study. MSE, VPS, LH, FP, VE, CD, CE, HE and PV participated in the design of the CRF, drafting and revision of the protocol and manuscript and approved the final version.

## Funding statement

This research received no specific grant from any funding agency in the public, commercial or not-for-profit sectors.

## Competing interests

The authors declare that there are no competing interests.

## Sponsor contact information

Hospices Civils de Lyon, BP 2251, 3 quai des Célestins, 69229 LYON cedex 02-France

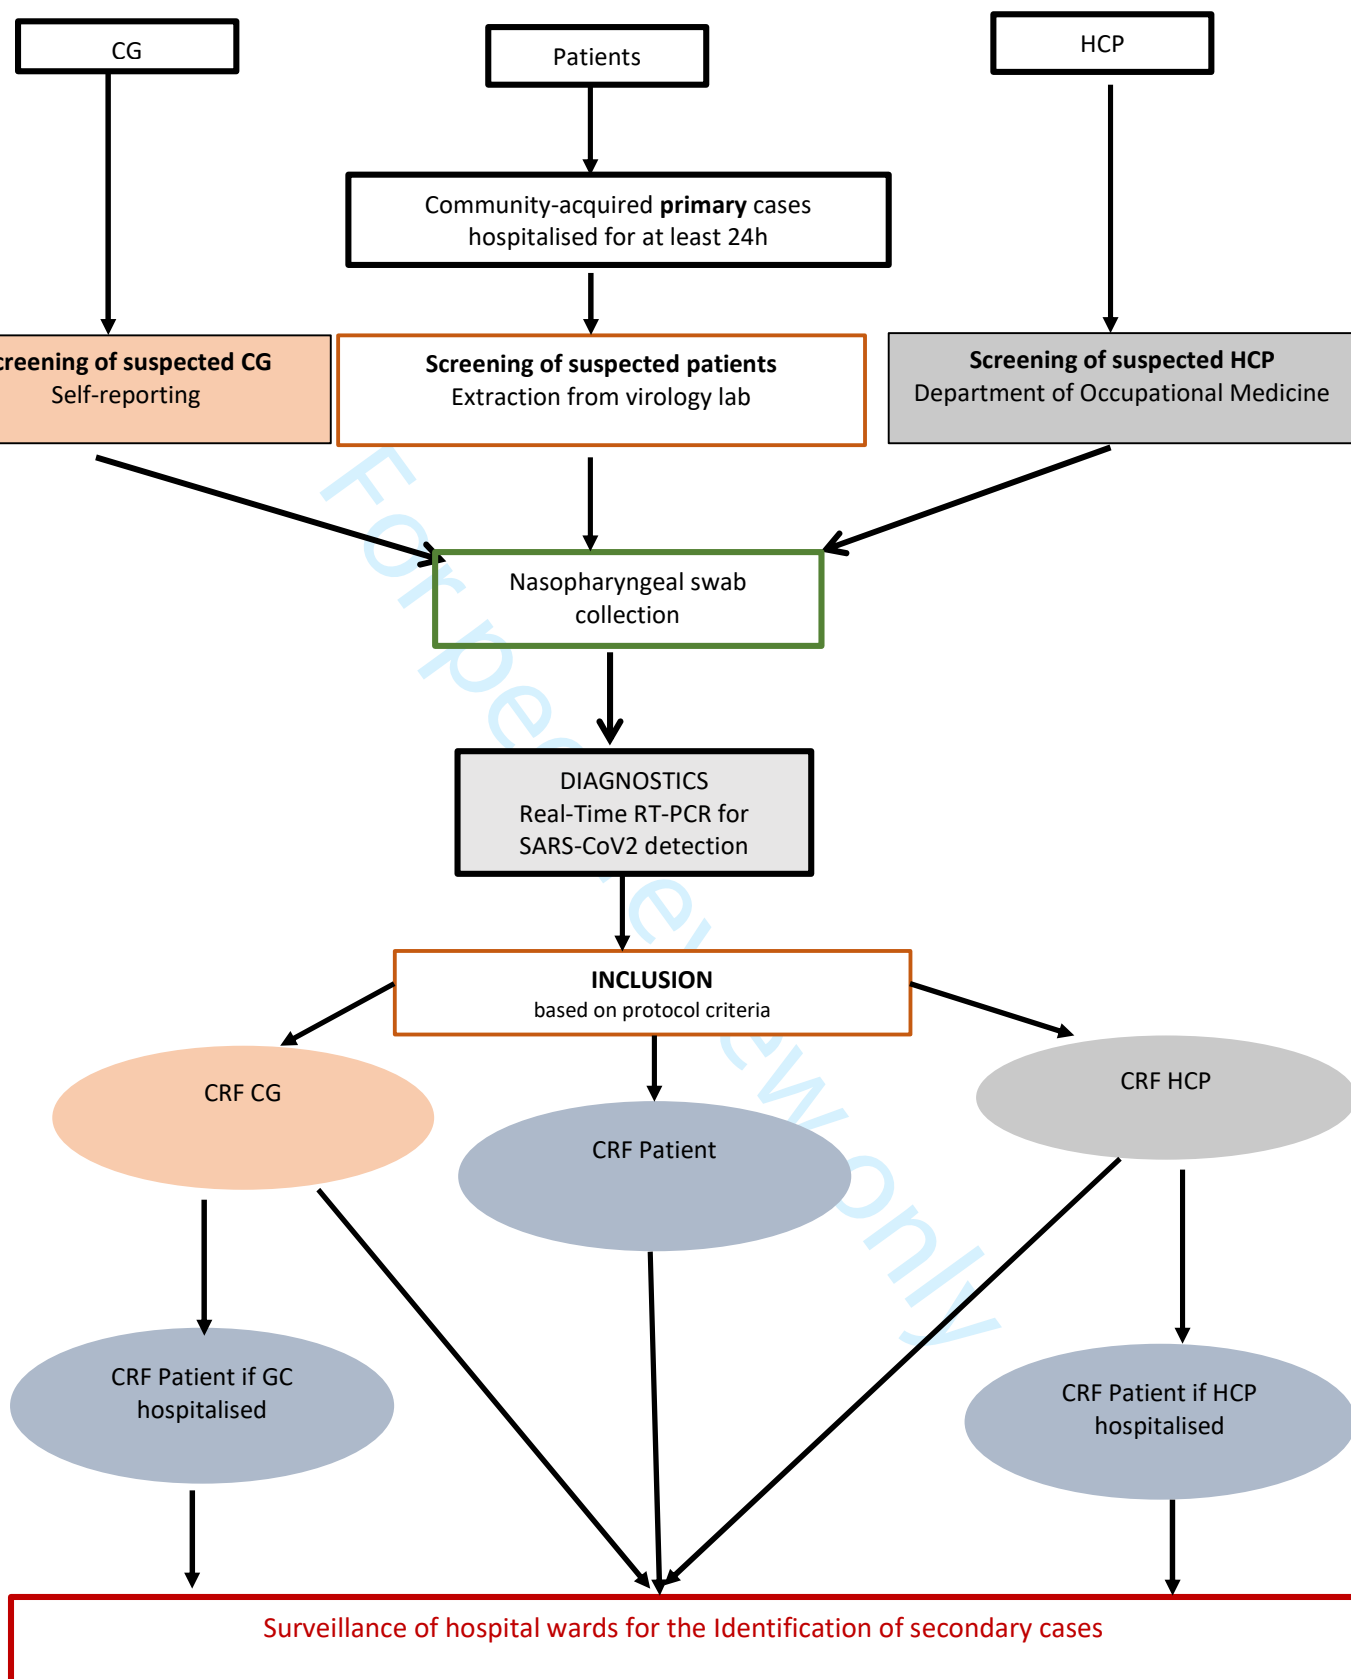

# Reporting checklist for protocol of a clinical trial.

Based on the SPIRIT guidelines.

## Instructions to authors

Complete this checklist by entering the page numbers from your manuscript where readers will find each of the items listed below.

Your article may not currently address all the items on the checklist. Please modify your text to include the missing information. If you are certain that an item does not apply, please write "n/a" and provide a short explanation.

Upload your completed checklist as an extra file when you submit to a journal.

In your methods section, say that you used the SPIRIT reporting guidelines, and cite them as:

Chan A-W, Tetzlaff JM, Altman DG, Laupacis A, Gøtzsche PC, Krleža-Jerić K, Hróbjartsson A, Mann H, Dickersin K, Berlin J, Doré C, Parulekar W, Summerskill W, Groves T, Schulz K, Sox H, Rockhold FW, Rennie D, Moher D. SPIRIT 2013 Statement: Defining standard protocol items for clinical trials. *Ann Intern Med.* 2013;158(3):200-207

|                                   |                                                                                                                                 |  | Page   |
|-----------------------------------|---------------------------------------------------------------------------------------------------------------------------------|--|--------|
|                                   | Reporting Item                                                                                                                  |  | Number |
| <b>Administrative information</b> |                                                                                                                                 |  |        |
| Title                             | <a href="#">#1</a> Descriptive title identifying the study design, population, interventions, and, if applicable, trial acronym |  | 1      |

|                                                                                  |                                                                  |                     |                                                                                                                                                                                                                                                                                          |     |
|----------------------------------------------------------------------------------|------------------------------------------------------------------|---------------------|------------------------------------------------------------------------------------------------------------------------------------------------------------------------------------------------------------------------------------------------------------------------------------------|-----|
| 1<br>2<br>3<br>4<br>5<br>6                                                       | Trial registration                                               | <a href="#">#2a</a> | Trial identifier and registry name. If not yet registered, name of intended registry                                                                                                                                                                                                     | 1   |
| 7<br>8<br>9<br>10<br>11                                                          | Trial registration:<br>data set                                  | <a href="#">#2b</a> | All items from the World Health Organization Trial Registration Data Set                                                                                                                                                                                                                 | 1   |
| 12<br>13<br>14                                                                   | Protocol version                                                 | <a href="#">#3</a>  | Date and version identifier                                                                                                                                                                                                                                                              | All |
| 15<br>16<br>17<br>18<br>19                                                       | Funding                                                          | <a href="#">#4</a>  | Sources and types of financial, material, and other support                                                                                                                                                                                                                              | 22  |
| 20<br>21<br>22<br>23<br>24<br>25<br>26<br>27                                     | Roles and<br>responsibilities:<br>contributorship                | <a href="#">#5a</a> | Names, affiliations, and roles of protocol contributors                                                                                                                                                                                                                                  | 22  |
| 28<br>29<br>30<br>31<br>32<br>33<br>34<br>35<br>36<br>37                         | Roles and<br>responsibilities:<br>sponsor contact<br>information | <a href="#">#5b</a> | Name and contact information for the trial sponsor                                                                                                                                                                                                                                       | 22  |
| 38<br>39<br>40<br>41<br>42<br>43<br>44<br>45<br>46<br>47<br>48<br>49<br>50<br>51 | Roles and<br>responsibilities:<br>sponsor and funder             | <a href="#">#5c</a> | Role of study sponsor and funders, if any, in study design; collection, management, analysis, and interpretation of data; writing of the report; and the decision to submit the report for publication, including whether they will have ultimate authority over any of these activities |     |
| 52<br>53<br>54<br>55<br>56<br>57<br>58<br>59<br>60                               | Roles and<br>responsibilities:<br>committees                     | <a href="#">#5d</a> | Composition, roles, and responsibilities of the coordinating centre, steering committee, endpoint adjudication committee, data management team, and                                                                                                                                      | NA  |

other individuals or groups overseeing the trial, if applicable (see Item 21a for data monitoring committee)

## Introduction

Background and rationale [#6a](#) Description of research question and justification for undertaking the trial, including summary of relevant studies (published and unpublished) examining benefits

and harms for each intervention

Background and rationale: choice of comparators [#6b](#) Explanation for choice of comparators N A

Objectives [#7](#) Specific objectives or hypotheses 7-8

Trial design [#8](#) Description of trial design including type of trial (eg, parallel group, crossover, factorial, single group), allocation ratio, and framework (eg, superiority, equivalence, non-inferiority, exploratory)

## Methods:

Participants, interventions, and outcomes

Study setting [#9](#) Description of study settings (eg, community clinic, academic hospital) and list of countries where data will be collected. Reference to where list of study sites can be obtained 8

|    |                      |                      |                                                              |       |
|----|----------------------|----------------------|--------------------------------------------------------------|-------|
| 1  | Eligibility criteria | <a href="#">#10</a>  | Inclusion and exclusion criteria for participants. If        | 9     |
| 2  |                      |                      | applicable, eligibility criteria for study centres and       |       |
| 3  |                      |                      | individuals who will perform the interventions (eg,          |       |
| 4  |                      |                      | surgeons, psychotherapists)                                  |       |
| 5  |                      |                      |                                                              |       |
| 6  |                      |                      |                                                              |       |
| 7  |                      |                      |                                                              |       |
| 8  |                      |                      |                                                              |       |
| 9  |                      |                      |                                                              |       |
| 10 |                      |                      |                                                              |       |
| 11 | Interventions:       | <a href="#">#11a</a> | Interventions for each group with sufficient detail to allow | NA    |
| 12 |                      |                      | replication, including how and when they will be             |       |
| 13 | description          |                      | administered                                                 |       |
| 14 |                      |                      |                                                              |       |
| 15 |                      |                      |                                                              |       |
| 16 |                      |                      |                                                              |       |
| 17 |                      |                      |                                                              |       |
| 18 |                      |                      |                                                              |       |
| 19 | Interventions:       | <a href="#">#11b</a> | Criteria for discontinuing or modifying allocated            | NA    |
| 20 |                      |                      | interventions for a given trial participant (eg, drug dose   |       |
| 21 | modifications        |                      | change in response to harms, participant request, or         |       |
| 22 |                      |                      | improving / worsening disease)                               |       |
| 23 |                      |                      |                                                              |       |
| 24 |                      |                      |                                                              |       |
| 25 |                      |                      |                                                              |       |
| 26 |                      |                      |                                                              |       |
| 27 |                      |                      |                                                              |       |
| 28 |                      |                      |                                                              |       |
| 29 | Interventions:       | <a href="#">#11c</a> | Strategies to improve adherence to intervention              | NA    |
| 30 |                      |                      | protocols, and any procedures for monitoring adherence       |       |
| 31 | adherence            |                      | (eg, drug tablet return; laboratory tests)                   |       |
| 32 |                      |                      |                                                              |       |
| 33 |                      |                      |                                                              |       |
| 34 |                      |                      |                                                              |       |
| 35 |                      |                      |                                                              |       |
| 36 | Interventions:       | <a href="#">#11d</a> | Relevant concomitant care and interventions that are         | NA    |
| 37 |                      |                      | permitted or prohibited during the trial                     |       |
| 38 | concomitant care     |                      |                                                              |       |
| 39 |                      |                      |                                                              |       |
| 40 |                      |                      |                                                              |       |
| 41 |                      |                      |                                                              |       |
| 42 | Outcomes             | <a href="#">#12</a>  | Primary, secondary, and other outcomes, including the        | 11-12 |
| 43 |                      |                      | specific measurement variable (eg, systolic blood            |       |
| 44 |                      |                      | pressure), analysis metric (eg, change from baseline,        |       |
| 45 |                      |                      | final value, time to event), method of aggregation (eg,      |       |
| 46 |                      |                      | median, proportion), and time point for each outcome.        |       |
| 47 |                      |                      |                                                              |       |
| 48 |                      |                      |                                                              |       |
| 49 |                      |                      |                                                              |       |
| 50 |                      |                      |                                                              |       |
| 51 |                      |                      |                                                              |       |
| 52 |                      |                      |                                                              |       |
| 53 |                      |                      | Explanation of the clinical relevance of chosen efficacy     |       |
| 54 |                      |                      | and harm outcomes is strongly recommended                    |       |
| 55 |                      |                      |                                                              |       |
| 56 |                      |                      |                                                              |       |
| 57 |                      |                      |                                                              |       |
| 58 |                      |                      |                                                              |       |
| 59 |                      |                      |                                                              |       |
| 60 |                      |                      |                                                              |       |

|    |                           |                      |                                                           |     |
|----|---------------------------|----------------------|-----------------------------------------------------------|-----|
| 1  | Participant timeline      | <a href="#">#13</a>  | Time schedule of enrolment, interventions (including any  | 9   |
| 2  |                           |                      | run-ins and washouts), assessments, and visits for        |     |
| 3  |                           |                      | participants. A schematic diagram is highly               |     |
| 4  |                           |                      | recommended (see Figure)                                  |     |
| 5  |                           |                      |                                                           |     |
| 6  |                           |                      |                                                           |     |
| 7  |                           |                      |                                                           |     |
| 8  |                           |                      |                                                           |     |
| 9  |                           |                      |                                                           |     |
| 10 |                           |                      |                                                           |     |
| 11 | Sample size               | <a href="#">#14</a>  | Estimated number of participants needed to achieve        | 11  |
| 12 |                           |                      | study objectives and how it was determined, including     |     |
| 13 |                           |                      | clinical and statistical assumptions supporting any       |     |
| 14 |                           |                      | sample size calculations                                  |     |
| 15 |                           |                      |                                                           |     |
| 16 |                           |                      |                                                           |     |
| 17 |                           |                      |                                                           |     |
| 18 |                           |                      |                                                           |     |
| 19 |                           |                      |                                                           |     |
| 20 |                           |                      |                                                           |     |
| 21 | Recruitment               | <a href="#">#15</a>  | Strategies for achieving adequate participant enrolment   | 8-9 |
| 22 |                           |                      | to reach target sample size                               |     |
| 23 |                           |                      |                                                           |     |
| 24 |                           |                      |                                                           |     |
| 25 |                           |                      |                                                           |     |
| 26 | <b>Methods:</b>           |                      |                                                           |     |
| 27 |                           |                      |                                                           |     |
| 28 | <b>Assignment of</b>      |                      |                                                           |     |
| 29 | <b>interventions (for</b> |                      |                                                           |     |
| 30 | <b>controlled trials)</b> |                      |                                                           |     |
| 31 |                           |                      |                                                           |     |
| 32 |                           |                      |                                                           |     |
| 33 |                           |                      |                                                           |     |
| 34 |                           |                      |                                                           |     |
| 35 |                           |                      |                                                           |     |
| 36 | Allocation: sequence      | <a href="#">#16a</a> | Method of generating the allocation sequence (eg,         | NA  |
| 37 | generation                |                      | computer-generated random numbers), and list of any       |     |
| 38 |                           |                      | factors for stratification. To reduce predictability of a |     |
| 39 |                           |                      | random sequence, details of any planned restriction (eg,  |     |
| 40 |                           |                      | blocking) should be provided in a separate document       |     |
| 41 |                           |                      | that is unavailable to those who enrol participants or    |     |
| 42 |                           |                      | assign interventions                                      |     |
| 43 |                           |                      |                                                           |     |
| 44 |                           |                      |                                                           |     |
| 45 |                           |                      |                                                           |     |
| 46 |                           |                      |                                                           |     |
| 47 |                           |                      |                                                           |     |
| 48 |                           |                      |                                                           |     |
| 49 |                           |                      |                                                           |     |
| 50 |                           |                      |                                                           |     |
| 51 |                           |                      |                                                           |     |
| 52 |                           |                      |                                                           |     |
| 53 | Allocation                | <a href="#">#16b</a> | Mechanism of implementing the allocation sequence         | NA  |
| 54 | concealment               |                      | (eg, central telephone; sequentially numbered, opaque,    |     |
| 55 |                           |                      |                                                           |     |
| 56 |                           |                      |                                                           |     |
| 57 |                           |                      |                                                           |     |
| 58 | mechanism                 |                      |                                                           |     |
| 59 |                           |                      |                                                           |     |
| 60 |                           |                      |                                                           |     |

sealed envelopes), describing any steps to conceal the sequence until interventions are assigned

Allocation: [#16c](#) Who will generate the allocation sequence, who will implementation enrol participants, and who will assign participants to interventions

Blinding (masking) [#17a](#) Who will be blinded after assignment to interventions NA  
(eg, trial participants, care providers, outcome assessors, data analysts), and how

Blinding (masking): [#17b](#) If blinded, circumstances under which unblinding is NA  
emergency permissible, and procedure for revealing a participant's unblinding allocated intervention during the trial

**Methods: Data collection, management, and analysis**

Data collection plan [#18a](#) Plans for assessment and collection of outcome, 10-11  
baseline, and other trial data, including any related processes to promote data quality (eg, duplicate measurements, training of assessors) and a description of study instruments (eg, questionnaires, laboratory tests) along with their reliability and validity, if known.  
Reference to where data collection forms can be found, if not in the protocol



|    |                            |                      |                                                             |       |
|----|----------------------------|----------------------|-------------------------------------------------------------|-------|
| 1  | Data collection plan:      | <a href="#">#18b</a> | Plans to promote participant retention and complete         | NA    |
| 2  |                            |                      |                                                             |       |
| 3  | retention                  |                      | follow-up, including list of any outcome data to be         |       |
| 4  |                            |                      | collected for participants who discontinue or deviate from  |       |
| 5  |                            |                      | intervention protocols                                      |       |
| 6  |                            |                      |                                                             |       |
| 7  |                            |                      |                                                             |       |
| 8  |                            |                      |                                                             |       |
| 9  |                            |                      |                                                             |       |
| 10 |                            |                      |                                                             |       |
| 11 | Data management            | <a href="#">#19</a>  | Plans for data entry, coding, security, and storage,        | 12    |
| 12 |                            |                      | including any related processes to promote data quality     |       |
| 13 |                            |                      | (eg, double data entry; range checks for data values).      |       |
| 14 |                            |                      | Reference to where details of data management               |       |
| 15 |                            |                      | procedures can be found, if not in the protocol             |       |
| 16 |                            |                      |                                                             |       |
| 17 |                            |                      |                                                             |       |
| 18 |                            |                      |                                                             |       |
| 19 |                            |                      |                                                             |       |
| 20 |                            |                      |                                                             |       |
| 21 |                            |                      |                                                             |       |
| 22 |                            |                      |                                                             |       |
| 23 | Statistics: outcomes       | <a href="#">#20a</a> | Statistical methods for analysing primary and secondary     | 11-12 |
| 24 |                            |                      | outcomes. Reference to where other details of the           |       |
| 25 |                            |                      | statistical analysis plan can be found, if not in the       |       |
| 26 |                            |                      | protocol                                                    |       |
| 27 |                            |                      |                                                             |       |
| 28 |                            |                      |                                                             |       |
| 29 |                            |                      |                                                             |       |
| 30 |                            |                      |                                                             |       |
| 31 |                            |                      |                                                             |       |
| 32 |                            |                      |                                                             |       |
| 33 | Statistics: additional     | <a href="#">#20b</a> | Methods for any additional analyses (eg, subgroup and       | 11-12 |
| 34 | analyses                   |                      | adjusted analyses)                                          |       |
| 35 |                            |                      |                                                             |       |
| 36 |                            |                      |                                                             |       |
| 37 |                            |                      |                                                             |       |
| 38 | Statistics: analysis       | <a href="#">#20c</a> | Definition of analysis population relating to protocol non- | 11-12 |
| 39 | population and             |                      | adherence (eg, as randomised analysis), and any             |       |
| 40 | missing data               |                      | statistical methods to handle missing data (eg, multiple    |       |
| 41 |                            |                      | imputation)                                                 |       |
| 42 |                            |                      |                                                             |       |
| 43 |                            |                      |                                                             |       |
| 44 |                            |                      |                                                             |       |
| 45 |                            |                      |                                                             |       |
| 46 |                            |                      |                                                             |       |
| 47 |                            |                      |                                                             |       |
| 48 | <b>Methods: Monitoring</b> |                      |                                                             |       |
| 49 |                            |                      |                                                             |       |
| 50 |                            |                      |                                                             |       |
| 51 | Data monitoring:           | <a href="#">#21a</a> | Composition of data monitoring committee (DMC);             | NA    |
| 52 | formal committee           |                      | summary of its role and reporting structure; statement of   |       |
| 53 |                            |                      | whether it is independent from the sponsor and              |       |
| 54 |                            |                      |                                                             |       |
| 55 |                            |                      |                                                             |       |
| 56 |                            |                      |                                                             |       |
| 57 |                            |                      |                                                             |       |
| 58 |                            |                      |                                                             |       |
| 59 |                            |                      |                                                             |       |
| 60 |                            |                      |                                                             |       |

1 competing interests; and reference to where further  
 2 details about its charter can be found, if not in the  
 3 protocol. Alternatively, an explanation of why a DMC is  
 4 not needed  
 5  
 6  
 7  
 8  
 9

|                                                                            |                                      |                      |                                                                                                                                                                                                                                                |       |
|----------------------------------------------------------------------------|--------------------------------------|----------------------|------------------------------------------------------------------------------------------------------------------------------------------------------------------------------------------------------------------------------------------------|-------|
| 10<br>11<br>12<br>13<br>14<br>15<br>16<br>17<br>18<br>19                   | Data monitoring:<br>interim analysis | <a href="#">#21b</a> | Description of any interim analyses and stopping<br>guidelines, including who will have access to these<br>interim results and make the final decision to terminate<br>the trial                                                               | NA    |
| 20<br>21<br>22<br>23<br>24<br>25<br>26<br>27<br>28<br>29                   | Harms                                | <a href="#">#22</a>  | Plans for collecting, assessing, reporting, and managing<br>solicited and spontaneously reported adverse events<br>and other unintended effects of trial interventions or trial<br>conduct                                                     | NA    |
| 30<br>31<br>32<br>33<br>34<br>35<br>36<br>37                               | Auditing                             | <a href="#">#23</a>  | Frequency and procedures for auditing trial conduct, if<br>any, and whether the process will be independent from<br>investigators and the sponsor                                                                                              | 14    |
| 38<br>39<br>40<br>41<br>42                                                 | <b>Ethics and<br/>dissemination</b>  |                      |                                                                                                                                                                                                                                                |       |
| 43<br>44<br>45<br>46<br>47                                                 | Research ethics<br>approval          | <a href="#">#24</a>  | Plans for seeking research ethics committee /<br>institutional review board (REC / IRB) approval                                                                                                                                               | 15-16 |
| 48<br>49<br>50<br>51<br>52<br>53<br>54<br>55<br>56<br>57<br>58<br>59<br>60 | Protocol<br>amendments               | <a href="#">#25</a>  | Plans for communicating important protocol<br>modifications (eg, changes to eligibility criteria,<br>outcomes, analyses) to relevant parties (eg,<br>investigators, REC / IRBs, trial participants, trial<br>registries, journals, regulators) | 16    |

|    |                       |                      |                                                                |    |
|----|-----------------------|----------------------|----------------------------------------------------------------|----|
| 1  | Consent or assent     | <a href="#">#26a</a> | Who will obtain informed consent or assent from                | 15 |
| 2  |                       |                      |                                                                |    |
| 3  |                       |                      |                                                                |    |
| 4  |                       |                      | potential trial participants or authorised surrogates, and     |    |
| 5  |                       |                      |                                                                |    |
| 6  |                       |                      | how (see Item 32)                                              |    |
| 7  |                       |                      |                                                                |    |
| 8  |                       |                      |                                                                |    |
| 9  | Consent or assent:    | <a href="#">#26b</a> | Additional consent provisions for collection and use of        | NA |
| 10 |                       |                      |                                                                |    |
| 11 | ancillary studies     |                      | participant data and biological specimens in ancillary         |    |
| 12 |                       |                      |                                                                |    |
| 13 |                       |                      | studies, if applicable                                         |    |
| 14 |                       |                      |                                                                |    |
| 15 |                       |                      |                                                                |    |
| 16 | Confidentiality       | <a href="#">#27</a>  | How personal information about potential and enrolled          | 14 |
| 17 |                       |                      |                                                                |    |
| 18 |                       |                      |                                                                |    |
| 19 |                       |                      | participants will be collected, shared, and maintained in      |    |
| 20 |                       |                      |                                                                |    |
| 21 |                       |                      | order to protect confidentiality before, during, and after     |    |
| 22 |                       |                      |                                                                |    |
| 23 |                       |                      | the trial                                                      |    |
| 24 |                       |                      |                                                                |    |
| 25 |                       |                      |                                                                |    |
| 26 | Declaration of        | <a href="#">#28</a>  | Financial and other competing interests for principal          | 22 |
| 27 |                       |                      |                                                                |    |
| 28 | interests             |                      | investigators for the overall trial and each study site        |    |
| 29 |                       |                      |                                                                |    |
| 30 |                       |                      |                                                                |    |
| 31 |                       |                      |                                                                |    |
| 32 | Data access           | <a href="#">#29</a>  | Statement of who will have access to the final trial           | 14 |
| 33 |                       |                      |                                                                |    |
| 34 |                       |                      | dataset, and disclosure of contractual agreements that         |    |
| 35 |                       |                      |                                                                |    |
| 36 |                       |                      | limit such access for investigators                            |    |
| 37 |                       |                      |                                                                |    |
| 38 |                       |                      |                                                                |    |
| 39 | Ancillary and post    | <a href="#">#30</a>  | Provisions, if any, for ancillary and post-trial care, and for | NA |
| 40 |                       |                      |                                                                |    |
| 41 | trial care            |                      | compensation to those who suffer harm from trial               |    |
| 42 |                       |                      |                                                                |    |
| 43 |                       |                      | participation                                                  |    |
| 44 |                       |                      |                                                                |    |
| 45 |                       |                      |                                                                |    |
| 46 |                       |                      |                                                                |    |
| 47 | Dissemination policy: | <a href="#">#31a</a> | Plans for investigators and sponsor to communicate trial       | 16 |
| 48 |                       |                      |                                                                |    |
| 49 | trial results         |                      | results to participants, healthcare professionals, the         |    |
| 50 |                       |                      |                                                                |    |
| 51 |                       |                      | public, and other relevant groups (eg, via publication,        |    |
| 52 |                       |                      |                                                                |    |
| 53 |                       |                      | reporting in results databases, or other data sharing          |    |
| 54 |                       |                      |                                                                |    |
| 55 |                       |                      | arrangements), including any publication restrictions          |    |
| 56 |                       |                      |                                                                |    |
| 57 |                       |                      |                                                                |    |
| 58 |                       |                      |                                                                |    |
| 59 |                       |                      |                                                                |    |
| 60 |                       |                      |                                                                |    |

1 Dissemination policy: [#31b](#) Authorship eligibility guidelines and any intended use of 16  
 2 authorship professional writers  
 3  
 4  
 5

6 Dissemination policy: [#31c](#) Plans, if any, for granting public access to the full NA  
 7 reproducible protocol, participant-level dataset, and statistical code  
 8  
 9  
 10  
 11 research  
 12  
 13

## 14 Appendices

15  
 16  
 17 Informed consent [#32](#) Model consent form and other related documentation Appendix  
 18 materials given to participants and authorised surrogates 1  
 19  
 20  
 21

22  
 23 Biological specimens [#33](#) Plans for collection, laboratory evaluation, and storage of Appendix  
 24 biological specimens for genetic or molecular analysis in 2  
 25 the current trial and for future use in ancillary studies, if  
 26  
 27  
 28  
 29  
 30  
 31  
 32 applicable

33 None The SPIRIT checklist is distributed under the terms of the Creative Commons Attribution  
 34 License CC-BY-ND 3.0. This checklist can be completed online using <https://www.goodreports.org/>, a  
 35 tool made by the [EQUATOR Network](#) in collaboration with [Penelope.ai](#)  
 36  
 37  
 38  
 39  
 40  
 41  
 42  
 43  
 44  
 45  
 46  
 47  
 48  
 49  
 50  
 51  
 52  
 53  
 54  
 55  
 56  
 57  
 58  
 59  
 60

# BMJ Open

## Protocol for a prospective, observational, hospital-based multicentre study of nosocomial SARS-CoV2 transmission: The NOSO-COR Project

|                                 |                                                                                                                                                                                                                                                                                                                                                                                                                                                                                                                                                                                                                                                                                                                                                                                                                                                                                                                                                                                                                                                                                                                                                                                                                                                                                                                                                                                                                                                                                                                                                                          |
|---------------------------------|--------------------------------------------------------------------------------------------------------------------------------------------------------------------------------------------------------------------------------------------------------------------------------------------------------------------------------------------------------------------------------------------------------------------------------------------------------------------------------------------------------------------------------------------------------------------------------------------------------------------------------------------------------------------------------------------------------------------------------------------------------------------------------------------------------------------------------------------------------------------------------------------------------------------------------------------------------------------------------------------------------------------------------------------------------------------------------------------------------------------------------------------------------------------------------------------------------------------------------------------------------------------------------------------------------------------------------------------------------------------------------------------------------------------------------------------------------------------------------------------------------------------------------------------------------------------------|
| Journal:                        | <i>BMJ Open</i>                                                                                                                                                                                                                                                                                                                                                                                                                                                                                                                                                                                                                                                                                                                                                                                                                                                                                                                                                                                                                                                                                                                                                                                                                                                                                                                                                                                                                                                                                                                                                          |
| Manuscript ID                   | bmjopen-2020-039088.R1                                                                                                                                                                                                                                                                                                                                                                                                                                                                                                                                                                                                                                                                                                                                                                                                                                                                                                                                                                                                                                                                                                                                                                                                                                                                                                                                                                                                                                                                                                                                                   |
| Article Type:                   | Protocol                                                                                                                                                                                                                                                                                                                                                                                                                                                                                                                                                                                                                                                                                                                                                                                                                                                                                                                                                                                                                                                                                                                                                                                                                                                                                                                                                                                                                                                                                                                                                                 |
| Date Submitted by the Author:   | 28-Jul-2020                                                                                                                                                                                                                                                                                                                                                                                                                                                                                                                                                                                                                                                                                                                                                                                                                                                                                                                                                                                                                                                                                                                                                                                                                                                                                                                                                                                                                                                                                                                                                              |
| Complete List of Authors:       | <p>Saadatian-Elahi, Mitra; Hospices Civils de Lyon, Hygiene, Epidemiology and Public Health; Laboratoire des Pathogènes Emergents, Fondation Mérieux, Centre International de Recherche en Infectiologie (CIRI), INSERM U1111, CNRS, Lyon, France</p> <p>Picot, Valentina; Fondation Merieux</p> <p>Hénaff, Laetitia; Fondation Merieux, Laboratoire des Pathogènes Emergents, Fondation Mérieux, Centre International de Recherche en Infectiologie (CIRI), INSERM U1111, CNRS</p> <p>Pradel, Florence; Fondation Merieux</p> <p>Escuret, Vanessa; Hospices Civils de Lyon, Laboratoire de Virologie, Institut des Agents Infectieux, Hôpital de la Croix-Rousse; Virpath - Grippe, de l'émergence au contrôle, Centre International de Recherche en Infectiologie (CIRI), Inserm U111, CNRS 5308, ENS, UCBL1, Faculté de Médecine RTH Laënnec</p> <p>Dananché, Cédric; Hospices Civils de Lyon, Hospices Civils de Lyon, Hôpital Edouard Herriot, Service d'Hygiène, Epidémiologie et Prévention, Lyon, France</p> <p>Elias, Christelle; Laboratoire des Pathogènes Emergents, Fondation Mérieux, Centre International de Recherche en Infectiologie (CIRI), INSERM U1111, CNRS, Lyon, France; Hospices Civils de Lyon, Service Hygiène, Epidémiologie et Prévention, Centre Hospitalier Edouard Herriot</p> <p>Endtz, Hubert; Erasmus Medical Centre, Medical Microbiology &amp; Infectious Diseases; Fondation Mérieux,</p> <p>Vanhems, Philippe; Hospices Civils de Lyon, Hôpital Edouard Herriot, Service d'Hygiène, Epidémiologie et Prévention, Lyon, France</p> |
| <b>Primary Subject Heading</b>: | Epidemiology                                                                                                                                                                                                                                                                                                                                                                                                                                                                                                                                                                                                                                                                                                                                                                                                                                                                                                                                                                                                                                                                                                                                                                                                                                                                                                                                                                                                                                                                                                                                                             |
| Secondary Subject Heading:      | Infectious diseases, Public health                                                                                                                                                                                                                                                                                                                                                                                                                                                                                                                                                                                                                                                                                                                                                                                                                                                                                                                                                                                                                                                                                                                                                                                                                                                                                                                                                                                                                                                                                                                                       |
| Keywords:                       | EPIDEMIOLOGY, Protocols & guidelines < HEALTH SERVICES ADMINISTRATION & MANAGEMENT, INFECTIOUS DISEASES, Epidemiology < INFECTIOUS DISEASES, Infection control < INFECTIOUS DISEASES, Public health < INFECTIOUS DISEASES                                                                                                                                                                                                                                                                                                                                                                                                                                                                                                                                                                                                                                                                                                                                                                                                                                                                                                                                                                                                                                                                                                                                                                                                                                                                                                                                                |
|                                 |                                                                                                                                                                                                                                                                                                                                                                                                                                                                                                                                                                                                                                                                                                                                                                                                                                                                                                                                                                                                                                                                                                                                                                                                                                                                                                                                                                                                                                                                                                                                                                          |

1  
2  
3  
4  
5  
6  
7  
8  
9  
10  
11  
12  
13  
14  
15  
16  
17  
18  
19  
20  
21  
22  
23  
24  
25  
26  
27  
28  
29  
30  
31  
32  
33  
34  
35  
36  
37  
38  
39  
40  
41  
42  
43  
44  
45  
46  
47  
48  
49  
50  
51  
52  
53  
54  
55  
56  
57  
58  
59  
60



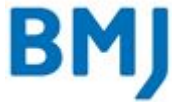

I, the Submitting Author has the right to grant and does grant on behalf of all authors of the Work (as defined in the below author licence), an exclusive licence and/or a non-exclusive licence for contributions from authors who are: i) UK Crown employees; ii) where BMJ has agreed a CC-BY licence shall apply, and/or iii) in accordance with the terms applicable for US Federal Government officers or employees acting as part of their official duties; on a worldwide, perpetual, irrevocable, royalty-free basis to BMJ Publishing Group Ltd ("BMJ") its licensees and where the relevant Journal is co-owned by BMJ to the co-owners of the Journal, to publish the Work in this journal and any other BMJ products and to exploit all rights, as set out in our [licence](#).

The Submitting Author accepts and understands that any supply made under these terms is made by BMJ to the Submitting Author unless you are acting as an employee on behalf of your employer or a postgraduate student of an affiliated institution which is paying any applicable article publishing charge ("APC") for Open Access articles. Where the Submitting Author wishes to make the Work available on an Open Access basis (and intends to pay the relevant APC), the terms of reuse of such Open Access shall be governed by a Creative Commons licence – details of these licences and which [Creative Commons](#) licence will apply to this Work are set out in our licence referred to above.

Other than as permitted in any relevant BMJ Author's Self Archiving Policies, I confirm this Work has not been accepted for publication elsewhere, is not being considered for publication elsewhere and does not duplicate material already published. I confirm all authors consent to publication of this Work and authorise the granting of this licence.

1  
2  
3 **Protocol for a prospective, observational, hospital-based multicentre study of**  
4 **nosocomial SARS-CoV2 transmission**  
5

6  
7 **The NOSO-COR Project**  
8

9 Mitra Saadatian-Elahi,<sup>1,2</sup> Valentina Picot-Sanchez,<sup>1,3</sup> Laetitia Henaff,<sup>1</sup> Florence Pradel,<sup>1,3</sup> Vanessa

10 Escuret,<sup>4,5</sup> Cédric Dananché,<sup>1,2</sup> Christelle Elias,<sup>1,2</sup> Hubert Endtz,<sup>1,3</sup> Philippe Vanhems<sup>1,2,6</sup>  
11  
12

13  
14 <sup>1</sup> Laboratoire des Pathogènes Emergents, Fondation Mérieux, Centre International de

15 Recherche en Infectiologie (CIRI), INSERM U1111, CNRS, Lyon, France  
16

17  
18 <sup>2</sup> Service Hygiène, Epidémiologie et Prévention, Centre Hospitalier Edouard Herriot, Hospices

19 Civils de Lyon, Lyon, France  
20  
21

22 <sup>3</sup> Fondation Mérieux, France  
23  
24

25  
26 <sup>4</sup> Laboratoire de Virologie, Institut des Agents Infectieux, Hôpital de la Croix-Rousse, Hospices

27 Civils de Lyon, Lyon, France  
28  
29

30  
31 <sup>5</sup> Virpath - Grippe, de l'émergence au contrôle, Centre International de Recherche en

32 Infectiologie (CIRI), Inserm U111, CNRS 5308, ENS, UCBL1, Faculté de Médecine RTH Laënnec,  
33

34 Lyon, France  
35  
36

37  
38 <sup>6</sup> Inserm, F-CRIN, Lyon center of Innovative Clinical Research Network in Vaccinology

39 (I REIVAC), CIC 1417, Paris, France  
40  
41

42  
43 **Correspondence to**  
44

45  
46 Professor Philippe Vanhems  
47

48 Groupement Hospitalier Centre, Unité d'Hygiène, Epidémiologie, Prévention - Bâtiment 1  
49

50  
51 5, place d'Arsonval-69437 Lyon cedex 3  
52

53  
54 Phone: +33 4 72 11 07 20  
55

56  
57 Fax: +33 4 72 11 07 26  
58  
59



1  
2  
3 E-mail: [Philippe.vanhems@chu-lyon.fr](mailto:Philippe.vanhems@chu-lyon.fr)  
4  
5

## 6 **Abstract**

7  
8 **Introduction:** The newly identified SARS-CoV2 can cause serious acute respiratory infections  
9  
10 such as pneumonia. In France mortality rate in the general population was approximately 10%  
11  
12 and could reach higher levels at the hospital. In the current context of high incidence rates of  
13  
14 SARS-CoV2 in the community, a significant increase in the rate of nosocomial transmission is  
15  
16 expected. The risk of nosocomial transmission could even be higher in low-income countries  
17  
18 that have fragile healthcare systems. This protocol is intended to estimate the prevalence and  
19  
20 incidence of suspected or confirmed cases of nosocomial SARS-CoV2 infection, the clinical  
21  
22 spectrum and the determinants (risk factors/protective) at participating hospitals.  
23  
24  
25  
26  
27  
28  
29

30 **Methods and analysis:** This will be an international multicentre prospective, observational,  
31  
32 hospital-based study in adults and children. It will include volunteer patients and healthcare  
33  
34 professionals in France and hospitals affiliated with the GABRIEL network. Demographic and  
35  
36 clinical data will be collected using case-report forms designed especially for the purpose of the  
37  
38 project. A nasopharyngeal swab will be collected and tested for SARS-CoV2 by Reverse  
39  
40 Transcriptase Polymerase Chain Reaction. Characteristics of the study participants, the  
41  
42 proportion of confirmed nosocomial SARS-CoV2 infections relative to all patients with  
43  
44 syndromes suggestive of SARS-CoV2 infection will be analysed. Appropriate multivariate  
45  
46 modelling will be used to identify the determinants associated with nosocomial onset.  
47  
48  
49  
50  
51  
52  
53  
54  
55  
56  
57  
58  
59  
60

1  
2  
3 **Ethics and dissemination:** This study was approved by the clinical research and committee of all  
4 participating countries. The findings will be submitted to peer-reviewed journal for publication  
5  
6 and shared with national health authorities.  
7  
8  
9

10  
11  
12  
13 **Registration details:** The trial was registered in ClinicalTrials (NCT04290780).  
14  
15

16  
17  
18 **Key words:** SARS-CoV2; nosocomial transmission, Multicentre prospective, France, Gabriel  
19  
20 Network  
21

22  
23 **Word count:** 3860  
24  
25  
26  
27  
28  
29

### 30 **Strengths and limitations of the study**

31

32  
33 ➤ This prospective study will generate original data on nosocomial SARS-CoV2 infection in  
34 France and in the low-income countries.  
35

36  
37 ➤ The results will provide the opportunity to document nosocomial SARS-CoV2 infection  
38 and pave the way to set-up new preventive recommendations.  
39

40  
41 ➤ Selection bias owing to access to care in different populations and bias owing to the  
42 extent of access to personal protective equipment, in particular, in low-income countries may  
43 occur.  
44  
45

46  
47 ➤ The non-exhaustivity of the confounders to be collected should be considered for  
48 interpretation of the results.  
49  
50  
51  
52  
53  
54  
55  
56  
57  
58  
59  
60

1  
2  
3       ➤ Only symptomatic cases were included in the study. Pauci-symptomatic and  
4  
5 asymptomatic carriers might have been missed.  
6  
7  
8  
9  
10  
11  
12  
13  
14  
15  
16  
17  
18  
19  
20  
21  
22  
23  
24  
25  
26  
27  
28  
29  
30  
31  
32  
33  
34  
35  
36  
37  
38  
39  
40  
41  
42  
43  
44  
45  
46  
47  
48  
49  
50  
51  
52  
53  
54  
55  
56  
57  
58  
59  
60

## INTRODUCTION

Coronaviruses are enveloped viruses that mainly infect the upper digestive and respiratory tracts of mammals and birds. In humans, the viruses can cause mild respiratory infections but can also lead to serious infections such as pneumonia. During the past decade, two human coronaviruses SARS-CoV and MERS-CoV were the source of severe acute respiratory syndrome (SARS) and Middle East respiratory syndrome (MERS) epidemics in 2002 and 2012 respectively.<sup>1</sup>

The newly identified SARS-CoV2 is a single-stranded RNA virus belonging to the coronavirus crown virus family of the subfamily Orthocoronaviridae. SARS-CoV2 appears to be a recombinant virus between the bat coronavirus and a coronavirus of unknown origin.<sup>2</sup> The virus was first detected in December 2019 in Hubei province of China<sup>3-5</sup> and spread widely throughout China before crossing the borders into other countries.<sup>6</sup> SARS-CoV2 is mainly transmitted by respiratory droplets but can also be spread through aerial droplets or fomites by contact.<sup>7</sup>

COVID-19 is the emerging infectious disease caused by SARS-COV-2 infection. COVID-19 can manifest in many ways<sup>8-10</sup> even if asymptomatic cases have also been reported.<sup>11</sup> In France, mortality rate of 10% have been reported in the general population.<sup>12</sup> The estimated median incubation period of COVID-19 was 5.1 days (CI, 4.5 to 5.8 days) in a pooled analysis of 181 confirmed cases reported from around the world.<sup>13</sup>

On March 11, 2020, the World Health Organization (WHO) declared COVID-19 a pandemic, pointing to the over 118,000 cases of coronavirus in over 110 countries and territories around the world with the sustained risk of further global spread.

Analysis of the clinical presentation of the first case series (n=41) showed that 31% of the patients were admitted to intensive care units (ICU) and the crude mortality rate was 15%.<sup>14</sup>

1  
2  
3 COVID-19 related complications including severe pneumonia, respiratory distress, secondary  
4 bacterial infection, or decompensation for chronic heart or respiratory disease, mainly affected  
5 patients over 65. The cases described to date mostly occurred among patients with a history of  
6 chronic pathology,<sup>4, 14</sup> who were therefore more likely to be hospitalised.  
7  
8  
9  
10  
11

12  
13 In the absence of a preventive vaccine or curative treatment, current efforts to prevent and  
14 control the spread of SARS-CoV2 are based on early detection of cases along with infection  
15 control measures such as precautions against respiratory and direct-contact spread. In addition,  
16 specific measures are being applied to patients who should be cared for in single rooms, negative  
17 pressure ventilation if possible, wear surgical masks and practice strict hand hygiene using  
18 hydroalcoholic solutions, 70% ethanol solutions or chlorine-containing disinfectants. Class 2 or 3  
19 or N95 filtering facepiece respirators were recommended when performing aerosol-generating  
20 procedures. Specific recommendations have also been issued from the WHO and Center for  
21 Disease Control.<sup>15, 16</sup>  
22  
23  
24  
25  
26  
27  
28  
29  
30  
31  
32  
33  
34

35 As for the SARS and MERS-CoV epidemics and other respiratory viruses such as influenza or  
36 respiratory syncytial virus (RSV), cases of intra-hospital transmission of SARS-CoV2 have been  
37 reported and are going to continue to occur. In Wuhan alone, 1,080 healthcare professionals  
38 (HCP) were infected.<sup>17</sup> In China, more than 3,300 HCP were infected as of early March and in Italy,  
39 20% of the HCP participating in a survey reported Covid-19 infections.<sup>18</sup> According to the National  
40 French Public Health Agency, Santé Publique France, more than 30,000 HCP were infected since  
41 March 2020.<sup>19</sup>  
42  
43  
44  
45  
46  
47  
48  
49  
50  
51

52 HCP have a key position in the transmission process because they are exposed to both  
53 community-acquired and nosocomial cases.<sup>20, 21</sup> This risk is amplified when the incidence of the  
54  
55  
56  
57  
58  
59  
60

1  
2  
3 infection in the community is high. In the current context of high incidence rates of SARS-CoV2  
4  
5 in the community, a significant increase in the rate of nosocomial transmission is therefore  
6  
7 expected. The risk of nosocomial transmission would be even higher in low-income countries  
8  
9 owing to several factors such as the delay in diagnosis of COVID-19 patients, and the lack of  
10  
11 infrastructure, trained personnel, isolation units, and infection control programs.  
12  
13

14  
15 Beyond the morbidity and mortality associated with nosocomial COVIDs-19 infection, the  
16  
17 impact on the organisation of care and the additional costs caused by longer hospital stays are  
18  
19 still unknown, but will certainly be of consequence.  
20  
21

22  
23 The link between hospital (nosocomial) and community attack rates is a good indicator of  
24  
25 the effect of hospitalisation on the transmission of respiratory viruses.<sup>22</sup> Attack rates is defined  
26  
27 as the proportion of infected patients among the total number of patients at risk of being infected  
28  
29 during the epidemic period. The denominator, i.e. total number of at-risk individuals in the  
30  
31 community, is provided by the regional agency of public health for the calculation of attack rates  
32  
33 in the community while the number of hospitalized patients or patient-days of hospitalization  
34  
35 will be used as denominator for in-hospital calculation. Better understanding of the transmission  
36  
37 chains of SARS-CoV2 and the impact of control measures in healthcare units is essential to  
38  
39 achieving control of the pandemic. For example, the configuration of care units also appears to  
40  
41 play a role in transmission. Indeed, hospitalisation in a double room increased the risk of  
42  
43 contracting influenza in a hospital by 2.67-fold.<sup>23</sup>  
44  
45  
46  
47  
48

49  
50 Implementation of appropriate hygiene and preventive measures play a decisive role in the  
51  
52 control of nosocomial risk. Countries have implemented various measures according to their  
53  
54 national guidelines to curb the propagation of this emergent virus, thus, their comparison could  
55  
56  
57  
58  
59

1  
2  
3 allow to identify possible areas for improvement in patient care. The present manuscript  
4  
5 describes the protocol of an international multicentre prospective study whose aims are to  
6  
7 document suspected or confirmed nosocomial cases of COVID-19, their clinical spectrum and the  
8  
9 prognostic factors at participating hospitals.  
10  
11  
12  
13  
14

## 15 **Objectives**

16  
17 The principal aim of this study is to estimate the prevalence and incidence of suspected or  
18  
19 confirmed cases of nosocomial SARS-CoV2 infection among HCP and patients.  
20  
21

22  
23 The secondary objectives are to 1) to describe and document cases of community-acquired  
24  
25 SARS-CoV2 infection (prevalent cases on hospital admission) likely to be the source of nosocomial  
26  
27 infection and the clinical spectrum; 2) describe and document hospital-acquired SARS-CoV2  
28  
29 infection (incident cases) that may be the source of nosocomial transmission and their clinical  
30  
31 spectrum; 3) describe observance of infection control practices in settings where nosocomial  
32  
33 transmission could occur and compare the attack rates between the hospital and the community.  
34  
35 ; 4) estimate the incidence of infectious syndromes attributed to SARS-CoV2 and the proportion  
36  
37 of severe cases, including deaths; 5) describe subpopulations with SARS-CoV2 infection  
38  
39 depending on the hospital ward (for example: internal medicine vs. surgery vs. intensive care  
40  
41 units [ICU]); 6) compare the adjusted attack rates of nosocomial and community-acquired SARS-  
42  
43 CoV2 infection to identify contextual and/or environmental protective and risk factors in both  
44  
45 the hospital and community setting; 7) calculate the crude mortality rate and adjusted rates  
46  
47 according to clinical features stratified by age, comorbidities, type of ward, and community  
48  
49 versus hospital-acquired infection.  
50  
51  
52  
53  
54  
55  
56  
57  
58  
59  
60

## METHODS

### Study design and setting

This prospective, observational, hospital-based study will be carried out among volunteers patients, and HCP in university-affiliated hospitals (Hospices Civils de Lyon, Lyon, France), eight volunteered hospitals across France (Dijon, Grenoble, Paris, Puy-en-Velay, Saint Etienne, Périgueux, Eaubonne, Suresnes) and hospitals affiliated with the GABRIEL network (<https://www.gabriel-network.org/>), a network of research institutions mainly located in low-income countries and focused on the etiological agents of pneumonia. Other French or European university hospitals will be welcome and able to join the project on a voluntary basis.

### Patient and Public Involvement

No patient involved in our study.

### Recruitment

**Inclusion criteria:** Any adult/child patient or HCP from participating hospitals who give oral or written informed consent and who presents an infectious syndrome based on the WHO definition of COVID-19.<sup>24</sup>:

Suspected case: A patient with acute respiratory illness (fever and at least one sign/symptom of respiratory disease, e.g., cough, shortness of breath)

OR, a patient with any acute respiratory illness AND having been in contact with a confirmed or probable COVID-19 case (household, professional activity, travel) in the last 14 days prior to symptom onset;

OR, a patient with severe acute respiratory illness (fever and at least one sign/symptom of respiratory disease, e.g., cough, shortness of breath; AND requiring hospitalization) AND in the



1  
2  
3 absence of an alternative diagnosis that fully explains the clinical presentation.  
4

5  
6 Confirmed case: A person with laboratory confirmation of COVID-19 infection.  
7

8 **Exclusion criteria:** Individuals who do not meet the above criteria.  
9

10 The study flow chart is shown in Figure 1. Eligible patients will be identified by a clinical research  
11 assistant who will regularly contact hospital wards (emergency, geriatric, infectious diseases,  
12 etc.) and will review the results of the virology laboratory. The clinical research assistant will meet  
13 eligible individuals to explain the purpose of the study and obtain written informed consent.  
14  
15 Nosocomial cases will be defined according to the SARS-CoV-2 incubation period, estimated on  
16 average at 5 days and ranging from 1 to 14 days.<sup>13</sup> We assumed that a delay greater than 48  
17 hours between hospital admission and the onset of symptoms could be used to define a  
18 nosocomial case in order to ensure high sensitivity.  
19

20 Identification of infected HCP will be based on data from the department of occupational  
21 medicine. A confidential interview with the symptomatic HCP will be organized to describe the  
22 purpose of the study and obtain written informed consent.  
23  
24

25  
26  
27 **Participant timeline:** Enrolled participants will be followed up during their entire hospital stay.  
28 Information on further complications occurred during the follow-up period and vital status will  
29 be collected from the patient's medical file.  
30

31  
32  
33 **Index case:** An index case is defined as the first RT-PCR confirmed case of SARS-CoV2 infection in  
34 a given department during a given period.  
35

36  
37  
38 **Secondary case:** A secondary case is defined as a RT-PCR confirmed case i) who was in contact  
39 with an index case during the contagious period, currently defined as 5 days before and 15 days  
40 after the onset of symptoms in the index case; ii) who developed clinical features compatible  
41  
42  
43  
44  
45  
46  
47  
48  
49  
50  
51  
52  
53  
54  
55  
56  
57  
58  
59  
60

1  
2  
3 with the diagnostic criteria of SARS-CoV2 infection within 15 days of the onset of symptoms in  
4  
5 the index case.  
6  
7

8 The period of detection of secondary cases will be calculated according to the period of  
9  
10 contagiousness of the index case: [date of onset of symptoms] to [date of onset of symptoms +  
11  
12 15 days] and the incubation period of secondary cases (1 to 15 days). Secondary cases will  
13  
14 therefore be clinically detected in the time interval between [start date of symptoms in the index  
15  
16 case + 1 day] to [start date of symptoms in the index case +15 days].  
17  
18  
19

20 **Figure 1:** Study flow chart  
21  
22  
23  
24  
25

## 26 **Data collection**

### 27 **Clinical data**

28  
29 Data will be collected using case-report forms (CRF) designed especially for the purpose of this  
30  
31 project for patients, and HCP (Supplementary data). According to the operating modes of each  
32  
33 participating hospital and their organization in terms of clinical or epidemiological research, the  
34  
35 CRF will be completed during a face-to-face interview and the use of medical records. The CRF  
36  
37 has been pre-tested on a small number of patients and HCP and adjusted accordingly.  
38  
39  
40  
41  
42

43 CRF will include demographic characteristics, underlying comorbidities, medical history,  
44  
45 clinical, biological and laboratory data on the SARS-CoV2 infectious episode. In case the HCP is  
46  
47 hospitalized, a patient's CRF including additional data regarding information on hospitalisation  
48  
49 (ward specialty, type of room, etc.) and biological parameters (blood cell counts, etc.) will be  
50  
51 completed.  
52  
53  
54  
55  
56  
57  
58  
59  
60

1  
2  
3 The characteristics of the hospital and participating wards (specialties, number of beds,  
4 number of nurses and doctors, presence of an infection control unit, etc.) and infection control  
5 policies regarding the risk of infection by SARS-CoV2 will also be collected (Supplementary data).  
6  
7 In addition, all participating centres are requested to provide a copy of their guidelines regarding  
8 COVID-19 preventive measures and the adjustments of the guideline over the epidemic period.  
9  
10  
11  
12  
13  
14  
15  
16  
17

### 18 **Biological Sample collection and testing**

19  
20 A nasopharyngeal swab will be collected and tested for the presence of SARS-CoV2  
21 ribonucleic acid (RNA) by Real-Time Reverse Transcription Polymerase Chain Reaction (RT-PCR)  
22 for each patient or HCP that meets inclusion criteria. Samples will be tested by the closest virology  
23 laboratory where state-of-the-art SARS-CoV2 assay is performed. The results will be reported on  
24 laboratory forms created specifically for this study.  
25  
26  
27  
28  
29  
30  
31

32 If feasible, RT-PCR will be performed to detect a panel of other respiratory viruses (influenza  
33 A and B, RSV, rhinovirus, metapneumovirus, etc.) depending on the diagnostic practices available  
34 at each participating centre. Furthermore, SARS-CoV2 sequencing will be performed depending  
35 on the technical platforms available.  
36  
37  
38  
39  
40  
41

42 Biobanks are expected to be constituted and if possible, an aliquot of each sample will be  
43 stored in a Micronic tube at -20°C for at least 5 years after written informed consent is obtained.  
44  
45  
46

### 47 **Statistical methods**

#### 48 **Sample size**

49  
50 Given the descriptive nature and surveillance objectives of this observational study, reaching a  
51 predefined number of subjects is not realistic.  
52  
53  
54  
55  
56  
57  
58  
59  
60

## Statistical analyses

Data will be analysed using statistical methods to describe the characteristics of the healthcare setting and study participants, the percentage of COVID-19 of those presenting influenza-like illnesses, the percentage of nosocomial COVID-19 patients among the confirmed cases, etc.

The primary criteria will be the proportion of patients, and HCP with confirmed nosocomial SARS-CoV2 infection relative to all patients, and HCP with syndromes suggestive of SARS-CoV2 infection during the study period.

Secondary outcome criteria will be to i) describe the delay of onset of suspected or confirmed nosocomial COVID-19 infection for hospitalised patients; ii) estimate the attack rate of confirmed COVID-19 cases in hospitalised patients according to their length of stay; and iii) estimate the attack rate of confirmed COVID-19 cases among HCP.

Categorical variables will be described with frequencies (%) and compared using Chi-square or Fisher exact test as appropriate. Continuous variables will be described using mean and standard deviation or median and interquartile range according to normal distribution, and compared using Mann-Whitney or Kruskal-Wallis test as appropriate. Relative risk and 95% confidence interval will be used as a measure of association. Statistical tests were 2-tailed with a level of statistical significance of  $<0.05$ .

Appropriate multivariate modelling methods will be applied depending on the numbers of patients and the hypothesis tested (Poisson regression, Cox regression, logistic regression) to identify the determinants independently associated with outcomes. For example, the length of stay will be considered as the duration of exposure.

## Data management and archiving

## Case Report Form

All required information will be recorded on a paper-based CRF in a clear and legible manner and justification must be provided for all missing data. Erroneous data noted in the CRF will be clearly crossed out and the correct data will be written next to the crossed-out information, accompanied by the initials of the investigator or authorized person who made the correction, the date and, if possible, and a justification for the correction.

To reduce data-entry errors by predefining plausibility checks and facilitate the rapid transfer of data, the electronic CRF (e-CRF) version of the study CRF will also be available.

Transfer of the data to the coordinating centre in Lyon (France) will be performed via the e-CRF following approval by the French "**Commission nationale de l'informatique et des libertés (CNIL) - National Commission for Data Protection**". An alternative possibility will be to ensure periodic reporting (every 10 inclusions) by e-mailing the scan of the completed CRF to the coordinating centre.

## Data management

Collected data will be computerised in the coordinating centre in Lyon, France. Source documents and databases will be anonymous and locked with a password known only to the scientific staff. These data will be kept for a minimum of 10 years after the end of the study.

## Archiving

According to French law, the sponsor will keep the study documents (protocol and annexes, possible amendments, information forms, CRF, statistical analysis plan and output and the final study report) for a minimum of 25 years. After this period, the sponsor will be consulted before any data is destroyed.

1  
2  
3 Study-related documents and reports may be subject to audit or inspection by the sponsor  
4  
5 and/or other authorized bodies.  
6  
7

8 This study is part of the "Reference Methodology" (MR-003) in application of article 54,  
9  
10 paragraph 5 of French law N°78-17 of January 6, 1978. This change was approved on January 5,  
11  
12 2006 and modified on July 21, 2016. The Hospices Civils de Lyon, the promoter of the study, has  
13  
14 signed a commitment to comply with this "Reference Methodology".  
15  
16

### 17 **Rights to access source documents**

18  
19 Source documents are defined as any original documents, data, records in which data collected  
20  
21 for a clinical trial is first recorded. Source documents will be kept by the investigator for 10 years  
22  
23 or, if hospital medical records, by the hospital for 10 years. Each centre will have access to its  
24  
25 own data during the study.  
26  
27  
28

29  
30 To ensure quality control and auditing, the sponsor will be responsible for obtaining the  
31  
32 agreement of all parties involved in the research to guarantee direct access to all places where  
33  
34 the research is carried out and to source data, documents and reports.  
35  
36  
37

38 In accordance with current laws and regulations (articles L.1121-3 and R.5121-13 of the  
39  
40 French public health code), all documents and personal data required for monitoring, quality  
41  
42 control or auditing will be available to the persons in charge of these activities.  
43  
44

### 45 **Confidentiality**

46  
47 The principal and associate investigators are required to respect professional confidentiality  
48  
49 (articles 226-13 and 226-14 of the French Penal Code). In accordance with French laws regarding  
50  
51 the confidentiality of study participant personal data (article L.1121-3 of the French Public Health  
52  
53 Code) and clinical/laboratory results obtained throughout the study (article R. 5121-13 of the  
54  
55  
56  
57  
58  
59  
60

1  
2  
3 French Public Health Code), individuals with direct access to the data will take all necessary  
4  
5 precautions to ensure the confidentiality of the overall collected information.  
6  
7

8 All personal data concerning study participants will remain strictly confidential. To respect  
9  
10 privacy, all participant details will be anonymous for the purpose of database preparation. Study  
11  
12 subjects will be coded as follows: AAXXXZZYY. The first two letters will be either PA for a patient,  
13  
14 and HP for HCP. The following four digits will depend on the order of inclusion of the case and  
15  
16 the next two letters will correspond to the hospital code. Finally, the last two letters will  
17  
18 correspond to the country in which the hospital is located.  
19  
20  
21

## 22 **Quality control and assurance**

23  
24  
25 Quality assurance audits will be carried out by persons appointed by the promoter as well as the  
26  
27 inspections carried out by the Competent Authorities. All data, documents and reports can be  
28  
29 subject to regulatory audits and inspections without hindering medical confidentiality.  
30  
31

## 32 **Ethics and dissemination**

### 33 **Ethical approval**

34  
35  
36  
37  
38  
39  
40 Ethical approval has been obtained from all participating hospitals as follow: France (clinical  
41  
42 research and committee of Ile de France V, March 8, 2020); Guinea (Comité National d'éthique  
43  
44 pour la recherche en santé (CNRS), April 20, 2020); Mali (Comité d'Ethique des Facultés de  
45  
46 Médecine et de Pharmacie, FMOS/FPHAP, April 16, 2020); Ivory coast (Comité National d'Ethique  
47  
48 des Sciences et de la Santé- MI la Recherche en Santé (CNESVS), April 10, 2020); Madagascar  
49  
50 (Comité National d'Ethique de la Recherche Biomédicale, March 30, 2020); Bangladesh (ICDDR,B  
51  
52  
53  
54  
55  
56  
57  
58  
59  
60

1  
2  
3 ethical committee, April 10, 2020); Lebanon (USJ Hôtel Dieux comité d'éthique, March 5, 2020)  
4  
5 and Brazil (COMITÊS DE ÉTICA EM PESQUISAS (CEPS), May 28, 2020).  
6  
7

### 8 **Informed consent**

9  
10 Patients and HCP will be informed of the objectives and their rights to refuse to participate in the  
11  
12 study or withdraw at any time using simple, understandable terms. This information will be  
13  
14 provided by an information and consent form given to each participant. According to French law,  
15  
16 voluntary, oral informed consent will be obtained by the investigator before inclusion for the  
17  
18 epidemiological data while signed consent is needed for the collection of biological banks.  
19  
20 Consenting will be performed following the country's ethical guidelines. Informed consent will  
21  
22 be obtained from the parents of included children (<18 years old).  
23  
24  
25  
26

### 27 **Regulatory compliance**

28  
29 The research will be conducted in accordance with applicable laws and regulations currently in  
30  
31 place in France and internationally.  
32  
33  
34

### 35 **Withdrawal criteria**

36  
37 Subjects may request to withdraw from the study at any time and for any reason without  
38  
39 having to justify. In the event of a premature withdrawal, the investigator must document the  
40  
41 participant's reasons for withdrawal as completely as possible.  
42  
43  
44

### 45 **Stopping the research study**

46  
47 The sponsors reserve the right to interrupt the study at any time if the objectives are not being  
48  
49 met. In the event of premature termination of the study for security reasons, the information will  
50  
51 be transmitted by the sponsors to all concerned parties and to the local ethical committee within  
52  
53 15 days.  
54  
55  
56  
57  
58  
59  
60



### **Protocol amendments**

In the eventuality of changes in the existing protocol that significantly affect the scope or the scientific quality of the investigation, an amendment containing a verbatim description of the changes and reference (date and number) to the submission that contained the original protocol will be submitted to the ethical committee for their approval.

### **Dissemination**

Communications and scientific reports that emerge from this study will be carried out under the responsibility of the principal investigator in agreement with the associated investigators. Publication rules will follow international recommendations.<sup>25</sup>The findings will also be shared with national health authorities.

Authorship will follow the guidelines established by the International Committee of Medical Journal Editors (<http://www.icmje.org/>) which require substantive contributions to the design, conduct, interpretation, and reporting of a trial.

### **Discussion**

Human-to-human transmission of SARS-CoV2, including nosocomial transmission, is now well documented. The risk of amplification of spread of the disease in healthcare facilities is strong in case of a lack of infection control measures. Early recognition of nosocomial COVID-19 infection in patients or HCP is therefore essential for the setting up of immediate investigation and implementation of appropriate hygiene measures. Describing the signs and symptoms associated with nosocomial COVID-19 will enable comparisons with existing data on other nosocomial viral respiratory infections (i.e. influenza, respiratory syncytial virus, SARS-CoV, MERS-CoV).

1  
2  
3 The prospective design and face-to-face interviews will make it possible to reduce recall bias  
4  
5 and to collect accurate data. The expertise of the Lyon university-affiliated hospitals already  
6  
7 strongly involved in the surveillance of nosocomial infections and the extensive experience of  
8  
9 GABRIEL network countries in various research studies related to respiratory infections also  
10  
11 strengthen this research project. Participation in this project will enable the subjects to benefit  
12  
13 from the diagnostic results. Moreover, each centre will benefit from the overall data in order to  
14  
15 explore a particular scientific theme. The multicentric approach will allow high power for this  
16  
17 study and enable comparison of clinical characteristics of COVID-19 in worldwide settings.  
18  
19  
20  
21  
22

23 The results of the NOSO-COR project will provide original results that could: 1) constitute  
24  
25 additional evidence for a better understanding of the duration of the incubation and contagious  
26  
27 period of SARS-CoV2; 2) make it possible to tailor the definition of nosocomial SARS-CoV2  
28  
29 infection; 2) strengthen preventive campaigns for in-hospital transmission of SARS-CoV2; 3) pave  
30  
31 the way for new recommendations in terms of preventive measures; 4) supplement existing  
32  
33 recommendations by acquiring additional data concerning the transmission of the virus and  
34  
35 thereby contribute to improving control guidelines for similar respiratory viral epidemics. 5)  
36  
37 identify subpopulations that are at risk of acquiring COVID-19 at both community and hospital  
38  
39 level.  
40  
41  
42  
43  
44

45 Communication of the results of this study could raise awareness among HCP vis-à-vis their  
46  
47 roles in preventing the spread of the virus in hospitals and in their immediate surroundings and  
48  
49 could be used to support vaccination coverage if a vaccine becomes available in the future. The  
50  
51 contribution of strain genotyping, when this data becomes available on a large scale, could  
52  
53 complement epidemiological investigations targeting nosocomial transmission of Covid-19.<sup>26</sup>  
54  
55  
56  
57  
58  
59  
60

1  
2  
3 Asymptomatic and pauci-symptomatic cases will not be included in this study although SARS-  
4  
5 CoV2 transmission from asymptomatic cases has been documented.<sup>27</sup> This represents a major  
6  
7 weakness of our study because asymptomatic individuals may not be recognized by healthcare  
8  
9 workers, although they can become the source of nosocomial transmission in the hospital.  
10  
11 Furthermore, there is a risk of missing even symptomatic cases owing to the intensity of the  
12  
13 outbreak. This protocol has been drafted at the early stage of the epidemic. Data might change  
14  
15 over time. As many hospitals in France and overseas will be included, reporting bias may be  
16  
17 existing according to the availability of the data across the participating facilities. A measurement  
18  
19 bias on the laboratory parameters may occur as the laboratory tests are not performed by a  
20  
21 centralised testing facility.  
22  
23  
24  
25  
26  
27  
28  
29  
30  
31

## 32 **References**

- 33  
34  
35 1. de Wit E, van Doremalen N, Falzarano D, et al. SARS and MERS: recent insights into emerging  
36  
37 coronaviruses. *Nat Rev Microbiol*. 2016;14(8):523–534. doi:10.1038/nrmicro.2016.81  
38  
39
- 40 2. Ji W, Wang W, Zhao X, et al. Homologous recombination within the spike glycoprotein of the  
41  
42 newly identified coronavirus may boost cross-species transmission from snake to human. *J Med*  
43  
44 *Viro*. 2020;10.1002/jmv.25682. doi: 10.1002/jmv.25682.  
45  
46
- 47 3. Hui DS, I Azhar E, Madani TA, et al. The continuing 2019-nCoV epidemic threat of novel  
48  
49 coronaviruses to global health - The latest 2019 novel coronavirus outbreak in Wuhan, China.  
50  
51  
52 *Int J Infect Dis*. 2020; 91:264-266. doi: 10.1016/j.ijid.2020.01.009.  
53  
54  
55  
56  
57  
58  
59  
60

- 1  
2  
3 4. Zhu N, Zhang D, Wang W, et al; China Novel Coronavirus Investigating and Research Team. A  
4  
5 Novel Coronavirus from Patients with Pneumonia in China, 2019. *N Engl J Med*. 2020. doi:  
6  
7 10.1056/NEJMoa2001017.  
8  
9
- 10 5. Lu H, Stratton CW, Tang YW. Outbreak of Pneumonia of Unknown Etiology in Wuhan China:  
11  
12 the Mystery and the Miracle. *J Med Virol*. 2020;10.1002/jmv.25678. doi: 10.1002/jmv.25678.  
13  
14
- 15 6. Li R, Pei S, Chen B, et al. Substantial undocumented infection facilitates the rapid  
16  
17 dissemination of novel coronavirus (SARS-CoV2) [published online ahead of print, 2020 Mar 16].  
18  
19 *Science*. 2020; eabb3221. doi:10.1126/science.abb3221  
20  
21
- 22 7. Jin YH, Cai L, Cheng ZS, et al. A rapid advice guideline for the diagnosis and treatment of 2019  
23  
24 novel coronavirus (2019-nCoV) infected pneumonia (standard version). *Mil Med Res*.  
25  
26 2020;7(1):4. doi:10.1186/s40779-020-0233-6.  
27  
28
- 29 8. Lupia T, Scabini S, Pinna SM, et al. 2019-novel coronavirus outbreak: A new challenge. *J Glob*  
30  
31 *Antimicrob Resist*. 2020. pii: S2213-7165(20)30050-3. doi: 10.1016/j.jgar.2020.02.021.  
32  
33
- 34 9. Tian Y, Rong L, Nian W, He Y. Review article: gastrointestinal features in COVID-19 and the  
35  
36 possibility of faecal transmission. *Aliment Pharmacol Ther*. 2020;51(9):843-851.  
37  
38 doi:10.1111/apt.15731  
39
- 40 10. Adhikari SP, Meng S, Wu YJ, et al. Epidemiology, causes, clinical manifestation and  
41  
42 diagnosis, prevention and control of coronavirus disease (COVID-19) during the early outbreak  
43  
44 period: a scoping review. *Infect Dis Poverty*. 2020;9(1):29. doi:10.1186/s40249-020-00646-x.  
45  
46
- 47 11. Hu Z, Song C, Xu C, et al. Clinical characteristics of 24 asymptomatic infections with COVID-  
48  
49 19 screened among close contacts in Nanjing, China. *Sci China Life Sci*. 2020. doi:  
50  
51 10.1007/s11427-020-1661-4.  
52  
53  
54  
55  
56  
57  
58  
59  
60

- 1  
2  
3 12. Coronavirus: chiffres clés et évolution de la COVID-19 en France et dans le Monde. Santé  
4  
5 Publique France. [https://www.santepubliquefrance.fr/dossiers/coronavirus-covid-](https://www.santepubliquefrance.fr/dossiers/coronavirus-covid-19/coronavirus-chiffres-cles-et-evolution-de-la-covid-19-en-france-et-dans-le-monde#block-266151)  
6  
7 [19/coronavirus-chiffres-cles-et-evolution-de-la-covid-19-en-france-et-dans-le-monde#block-](https://www.santepubliquefrance.fr/dossiers/coronavirus-covid-19/coronavirus-chiffres-cles-et-evolution-de-la-covid-19-en-france-et-dans-le-monde#block-266151)  
8  
9 [266151](https://www.santepubliquefrance.fr/dossiers/coronavirus-covid-19/coronavirus-chiffres-cles-et-evolution-de-la-covid-19-en-france-et-dans-le-monde#block-266151).  
10  
11  
12  
13 13. Lauer SA, Grantz KH, Bi Q, et al. The Incubation Period of Coronavirus Disease 2019 (COVID-  
14  
15 19) From Publicly Reported Confirmed Cases: Estimation and Application. *Ann Intern Med*. 2020  
16  
17 May 5;172(9):577-582. doi: 10.7326/M20-0504.  
18  
19  
20 14. Huang C, Wang Y, Li X, et al. Clinical features of patients infected with 2019 novel  
21  
22 coronavirus in Wuhan, China. *Lancet*. 2020; S0140-6736(20)30183-5. doi: 10.1016/S0140-  
23  
24 6736(20)30183-5.  
25  
26  
27 15. Centre for Disease Control. Interim Infection Prevention and Control Recommendations for  
28  
29 Patients with Known or Patients Under Investigation for 2019 Novel Coronavirus (2019-nCoV) in  
30  
31 a Healthcare Setting. <https://www.cdc.gov/coronavirus/2019-nCoV/hcp/infection-control.html>  
32  
33  
34  
35 16. World Health Organisation. Infection prevention and control during health care when novel  
36  
37 coronavirus (nCoV) infection is suspected Interim guidance 25 January 2020. WHO/2019-  
38  
39 nCoV/IPC/v2020.2.  
40  
41  
42 17. Wang D, Hu B, Hu C, et al. Clinical Characteristics of 138 Hospitalized Patients With 2019  
43  
44 Novel Coronavirus-Infected Pneumonia in Wuhan, China [published online ahead of print, 2020  
45  
46 Feb 7]. *JAMA*. 2020; e201585. doi:10.1001/jama.2020.1585  
47  
48  
49 18. COVID-19: protecting health-care workers. The Lancet Editorial. [www.thelancet.com](http://www.thelancet.com) Vol  
50  
51 395 March 21, 2020. [https://doi.org/10.1016/S0140-6736\(20\)30644-9](https://doi.org/10.1016/S0140-6736(20)30644-9)  
52  
53  
54  
55  
56  
57  
58  
59  
60

- 1  
2  
3 19. Recensement national des cas de COVID-19 chez les professionnels en établissements de  
4  
5 santé. Santé Publique France. <https://www.santepubliquefrance.fr/etudes-et->  
6  
7  
8 enquetes/recensement-national-des-cas-de-covid-19-chez-les-professionnels-en-  
9  
10  
11 établissements-de-sante
- 12  
13 20. Voirin N, Payet C, Barrat A, et al. Combining high-resolution contact data with virological  
14  
15 data to investigate influenza transmission in a tertiary care hospital. *Infect Control Hosp*  
16  
17 *Epidemiol.* 2015;36(3):254-260.
- 18  
19  
20 21. Vanhems P, Barrat A, Cattuto C, et al. Estimating potential infection transmission routes in  
21  
22 hospital wards using wearable proximity sensors. *PLoS One.* 2013;8(9):e73970. doi:  
23  
24 10.1371/journal.pone.0073970. Erratum in: *PLoS One.* 2013;8(9).
- 25  
26  
27 22. Vanhems P, Voirin N, Bénet T, et al. Detection of Hospital Outbreaks of Influenza-Like Illness  
28  
29 Based on Excess of Incidence Rates Compared to the Community. *Am J Infect Control* 2014, 42  
30  
31 (12), 1325-1327.
- 32  
33  
34 23. Munier E, Bénet T, Régis C, et al. Hospitalisation in double-occupancy rooms and the risk of  
35  
36 hospital-acquired influenza: a prospective cohort study, *Clinical Microbiology and Infection*  
37  
38 2016, doi: 10.1016/j.cmi.2016.01.010.
- 39  
40  
41  
42 24. World Health Organisation. Coronavirus disease 2019 (COVID-19) Situation Report – 70.  
43  
44  
45 Page 9.  
46  
47 <https://www.who.int/docs/default-source/coronaviruse/situation-reports/20200330-sitrep-70->  
48  
49 [covid-19.pdf?sfvrsn=7e0fe3f8\\_2](https://www.who.int/docs/default-source/coronaviruse/situation-reports/20200330-sitrep-70-covid-19.pdf?sfvrsn=7e0fe3f8_2)  
50  
51  
52  
53  
54  
55  
56  
57  
58  
59  
60

1  
2  
3 25. International Committee of Medical Journal Editors. Uniform requirements for manuscripts  
4 submitted to biomedical journals. *N Engl J Med*. 1997;336(4):309–315.

5  
6  
7  
8 doi:10.1056/NEJM199701233360422  
9

10 26. Chen Y, Liu Q, Guo D. Coronaviruses: genome structure, replication, and pathogenesis. *J*  
11  
12  
13 *Med Virol*. 2020;10.1002/jmv.25681. doi: 10.1002/jmv.25681.

14  
15 27. Tian S, Hu N, Lou J, et al. Characteristics of COVID-19 infection in Beijing. *J Infect*.  
16  
17  
18 2020;80(4):401–406. doi:10.1016/j.jinf.2020.02.018.  
19

## 20 21 22 23 **Acknowledgment**

24  
25  
26 The authors thanks M. Peter Tucker for editing the manuscript.  
27

## 28 29 **Author contributions**

30  
31  
32  
33  
34  
35  
36  
37  
38  
39  
40  
41  
42  
43  
44  
45  
46  
47  
48  
49  
50  
51  
52  
53  
54  
55  
56  
57  
58  
59  
60  
PV designed the study. MSE, VPS, LH, FP, VE, CD, CE, HE and PV participated in the design of the  
CRF, drafting and revision of the protocol and manuscript and approved the final version.

## 36 37 38 39 40 41 42 43 44 45 46 47 48 49 50 51 52 53 54 55 56 57 58 59 60 **Funding statement**

This research received no specific grant from any funding agency in the public, commercial or  
not-for-profit sectors.

## 44 45 46 47 48 49 50 51 52 53 54 55 56 57 58 59 60 **Competing interests**

The authors declare that there are no competing interests.

## 49 50 51 52 53 54 55 56 57 58 59 60 **Sponsor contact information**

Hospices Civils de Lyon, BP 2251, 3 quai des Célestins, 69229 LYON cedex 02-France

1  
2  
3  
4  
5  
6  
7  
8  
9  
10  
11  
12  
13  
14  
15  
16  
17  
18  
19  
20  
21  
22  
23  
24  
25  
26  
27  
28  
29  
30  
31  
32  
33  
34  
35  
36  
37  
38  
39  
40  
41  
42  
43  
44  
45  
46  
47  
48  
49  
50  
51  
52  
53  
54  
55  
56  
57  
58  
59  
60

For peer review only



1  
2  
3  
4  
5  
6  
7  
8  
9  
10  
11  
12  
13  
14  
15  
16  
17  
18  
19  
20  
21  
22  
23  
24  
25  
26  
27  
28  
29  
30  
31  
32  
33  
34  
35  
36  
37  
38  
39  
40  
41  
42  
43  
44  
45  
46  
47  
48  
49  
50  
51  
52  
53  
54  
55  
56  
57  
58  
59  
60

For peer review only

Figure 1: Study flow chart

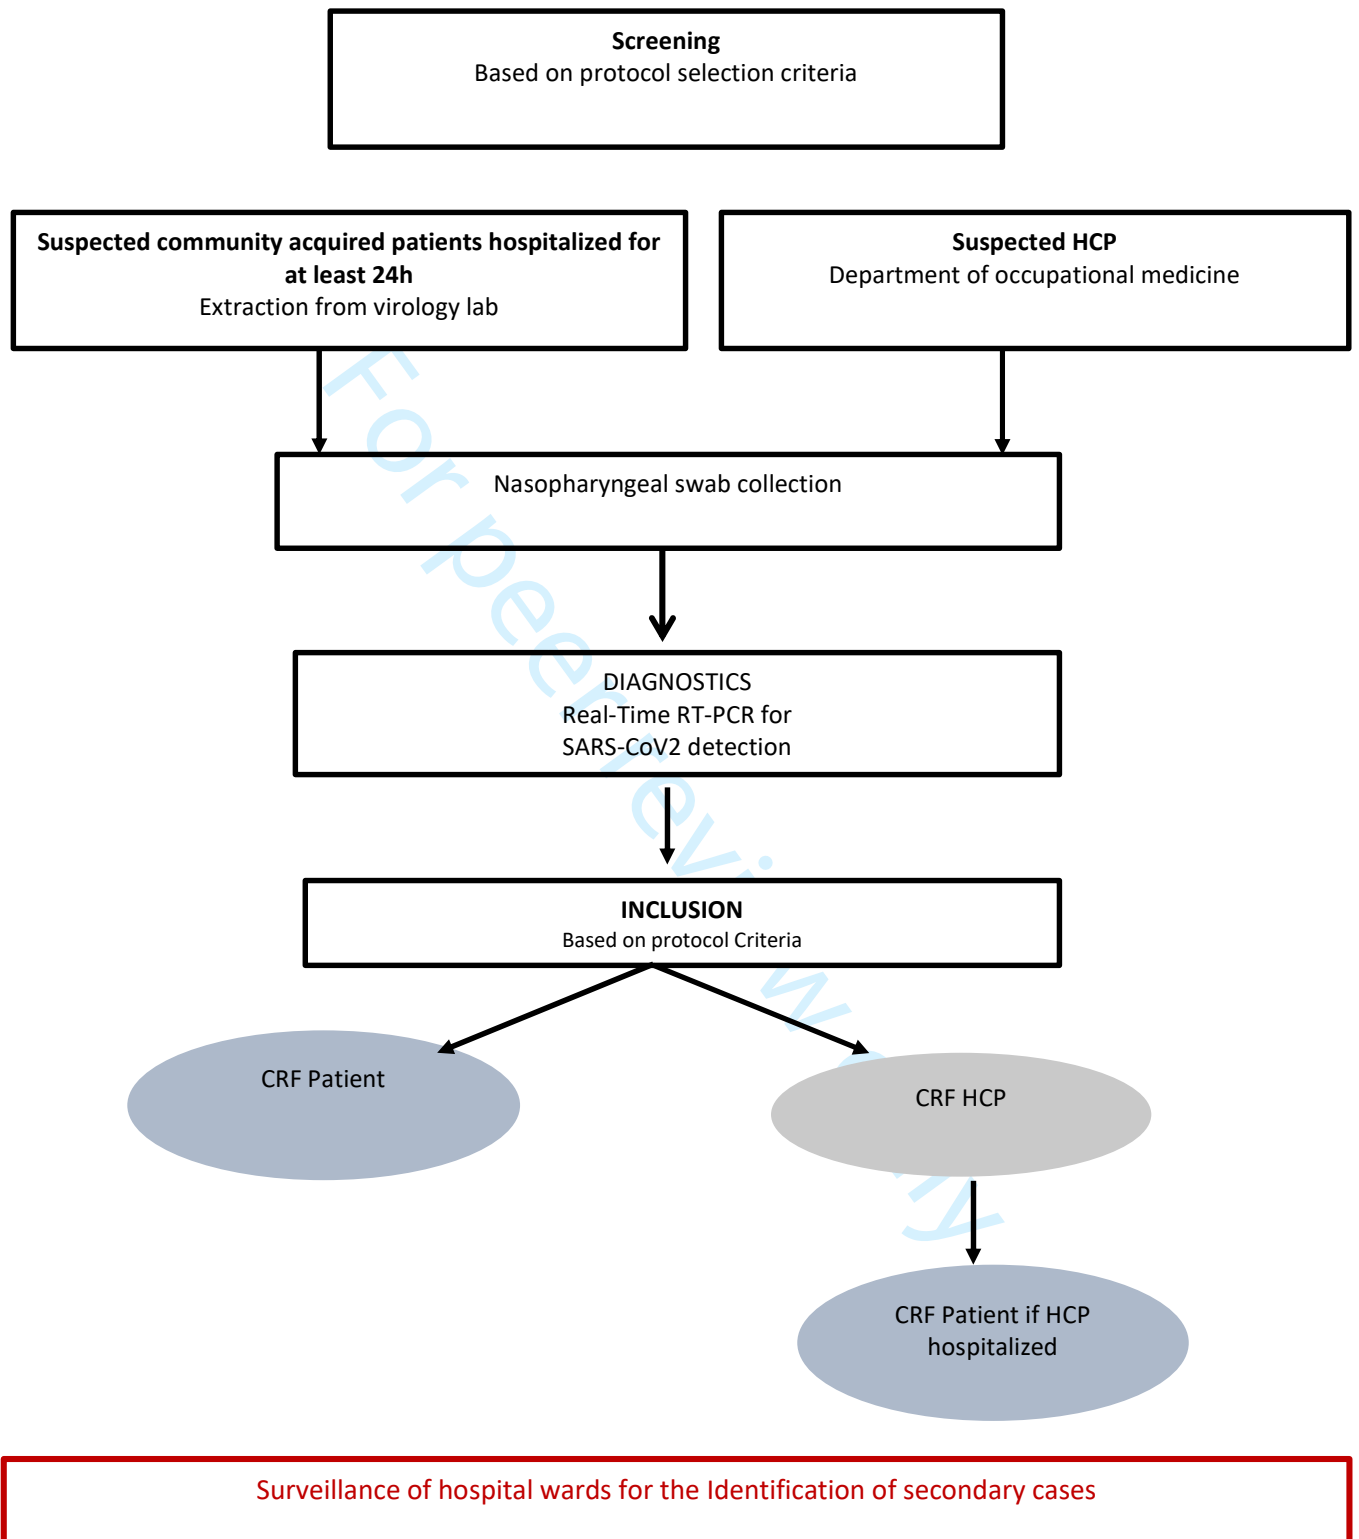

HCP: Health care professional

1  
2  
3  
4  
5  
6  
7  
8  
9  
10  
11  
12  
13  
14  
15  
16  
17  
18  
19  
20  
21  
22  
23  
24  
25  
26  
27  
28  
29  
30  
31  
32  
33  
34  
35  
36  
37  
38  
39  
40  
41  
42  
43  
44  
45  
46  
47  
48  
49  
50  
51  
52  
53  
54  
55  
56  
57  
58  
59  
60

**Supplementary material**

For peer review only



**Patient symptoms at admission (for community acquired cases) / at suspicion (for nosocomial cases)**

(check all reported symptoms):

- |                                                    |                                                 |                                                                |
|----------------------------------------------------|-------------------------------------------------|----------------------------------------------------------------|
| <input type="checkbox"/> History of fever / chills | <input type="checkbox"/> Shortness of breath    | <input type="checkbox"/> Pain (check all that apply)           |
| <input type="checkbox"/> General weakness          | <input type="checkbox"/> Diarrhoea              | <input type="checkbox"/> ( <i>muscular</i> ) ( <i>chest</i> )  |
| <input type="checkbox"/> Cough                     | <input type="checkbox"/> Nausea/vomiting        | <input type="checkbox"/> ( <i>abdominal</i> ) ( <i>joint</i> ) |
| <input type="checkbox"/> Sore throat               | <input type="checkbox"/> Headache               |                                                                |
| <input type="checkbox"/> Runny nose                | <input type="checkbox"/> Irritability/Confusion |                                                                |
| <input type="checkbox"/> Anosmia                   | <input type="checkbox"/> Ageusia                |                                                                |
| <input type="checkbox"/> Other, specify: _____     |                                                 |                                                                |

**Patient signs:**

- Temperature at admission/at suspicion: [ ] [ ] [ ] °C / °F Unknown
- Check all observed signs seen at least once during hospitalization:
- |                                                 |                                                     |                                                                      |
|-------------------------------------------------|-----------------------------------------------------|----------------------------------------------------------------------|
| <input type="checkbox"/> Pharyngeal exudate     | <input type="checkbox"/> Coma                       | Lung X-ray: <input type="checkbox"/> Yes <input type="checkbox"/> No |
| <input type="checkbox"/> Conjunctival injection | <input type="checkbox"/> Dyspnoea / tachypnoea      | If Yes: <input type="checkbox"/> Abnormal lung X-ray finding         |
| <input type="checkbox"/> Seizure                | <input type="checkbox"/> Abnormal lung auscultation |                                                                      |
| <input type="checkbox"/> Other, specify: _____  |                                                     |                                                                      |

**Underlying conditions and comorbidity at admission (check all that apply):**

- |                                                                        |                                                          |
|------------------------------------------------------------------------|----------------------------------------------------------|
| <input type="checkbox"/> Pregnancy (trimester: _____)                  | <input type="checkbox"/> Post-partum (< 6 weeks)         |
| <input type="checkbox"/> Cardiovascular disease,                       | <input type="checkbox"/> Immunodeficiency, including HIV |
| <input type="checkbox"/> Hypertension                                  | <input type="checkbox"/> Heart failure                   |
| <input type="checkbox"/> Diabetes                                      | <input type="checkbox"/> Renal disease                   |
| <input type="checkbox"/> Liver disease                                 | <input type="checkbox"/> Chronic lung disease            |
| <input type="checkbox"/> Chronic neurological or neuromuscular disease | <input type="checkbox"/> Asthma                          |
| <input type="checkbox"/> Hypothyroidism                                | <input type="checkbox"/> COPD                            |
| <input type="checkbox"/> Malignancy                                    | <input type="checkbox"/> Emphysema                       |
| <input type="checkbox"/> Rheumatic disease                             | <input type="checkbox"/> Chronic bronchitis              |
| <input type="checkbox"/> Other, specify: _____                         |                                                          |

**Smoking status**

- Current smoker  Ex-smoker, If Yes, Quit date [Y][LY][LY][LY]  Never  Data not available
- Alcohol consumption:  Daily  Weekly  Occasionally  Never  Data not available

**Section 3: Exposure in the 14 days prior to symptom onset (prior to reporting if asymptomatic)**

**Occupation:** (tick any that apply)

- |                                               |                                                   |                                                |
|-----------------------------------------------|---------------------------------------------------|------------------------------------------------|
| <input type="checkbox"/> Student              | <input type="checkbox"/> Health care worker       | <input type="checkbox"/> Other, specify: _____ |
| <input type="checkbox"/> Working with animals | <input type="checkbox"/> Health laboratory worker |                                                |

Has the patient visited any health care facility(ies) in the 14 days prior to symptom onset?  No  Yes  Unknown

Has the patient had **close contact**<sup>1</sup> with a person with acute respiratory infection in the 14 days prior to symptom onset?

- No  Yes  Unknown

If yes, contact setting (check all that apply):

- Health care setting  Family setting  Work place  Unknown  Other, specify: \_\_\_\_\_

Has the patient had contact with a probable or confirmed case in the 14 days prior to symptom onset? :

- No  Yes  Unknown

If yes, please list unique case identifiers of all probable or confirmed cases:

Case 1 identifier: \_\_\_\_\_ Case 2 identifier: \_\_\_\_\_ Case 3 identifier: \_\_\_\_\_

If yes, contact setting (check all that apply):

- Health care setting  Family setting  Work place  Unknown  Other, specify: \_\_\_\_\_

If yes, location/city/country for exposure: \_\_\_\_\_

Has the patient visited any live animal markets in the 14 days prior to symptom onset?  No  Yes  Unknown

If yes, location/city/country for exposure: \_\_\_\_\_

<sup>1</sup> **Close contact** is defined as:

- Health care associated exposure, including providing direct care to SARS-CoV-2 patients, working with health care workers infected with novel coronavirus, visiting patients or staying in the same close environment of a SARS-CoV-2 patient.
- Working together in close proximity or sharing the same classroom environment with a with a SARS-CoV-2 patient.
- Traveling together with SARS-CoV-2 patient in any kind of conveyance.
- Living in the same household as a SARS-CoV-2 patient

#### Section 4: Laboratory information

Nasopharyngeal sample taken: Yes  No  If yes, date: \_\_/\_\_/\_\_\_\_ Time (1 to 12): \_\_\_\_\_  AM (before noon)  
 PM (after noon)

Name of confirming laboratory: \_\_\_\_\_  
 Date of laboratory confirmation: [D][D]/[M][M]/[Y][Y][Y][Y] Time (1 to 12): \_\_\_\_\_  AM (before noon)  
 PM (after noon)

Please specify which assay was used: \_\_\_\_\_  
**Result:** SARS-CoV-2 positive  SARS-CoV-2 negative  Other respiratory virus tested: Yes  No   
 If Yes, Influenza A (no sub-type)  Influenza A(H1N1) pdm09  Influenza A(H3N2)  Influenza B (no sub-type)   
 Influenza B/Yamagata  Influenza B/Victoria  RSV  Other virus (\_\_\_\_\_)  No virus   
 Sequencing done will be?: Yes  No  Unknown

Several nasopharyngeal sample taken during hospitalization: Yes  No   
 If yes, date of first negative test: \_\_/\_\_/\_\_\_\_

#### Section 5: Information regarding hospitalization\* (NOSO-COR Project)

Specificity of the ward at inclusion:  ICU  Surgery  Medicine  Obstetrics  Other: \_\_\_\_\_  
 Number of rooms in the ward; \_\_\_\_\_ Number of beds in the ward: \_\_\_\_\_

ID (or name) of the ward: \_\_\_\_\_ Room N°: \_\_\_\_\_  
 Single room  
 Double room If yes, roommate  Present  Absent  
 More than 2 beds in the room, If yes, number of beds: \_\_\_\_\_ number of present roommate: \_\_\_\_\_

Did the patient move to other type of room during hospitalization?  Yes  No

Single room  
 Double room If yes, roommate  Present  Absent  
 More than 2 beds in the room, If yes, number of beds: \_\_\_\_\_ number of present roommate: \_\_\_\_\_

Hygiene prevention measures at entrance of the room:  Yes  No

Modification of preventive measures during hospitalization  Yes  No

If Yes, please specify \_\_\_\_\_

Does the patient wear a-mask when outside of the room for clinical examination or any other reasons?

Never  Sometimes  Always

Date admitted to the ward: [D][D]/[M][M]/[Y][Y][Y][Y]

Date discharged from the ward: [D][D]/[M][M]/[Y][Y][Y][Y]

#### Section 6: Biological parameters

| Parameter                   | Value | Parameter                 | Value |
|-----------------------------|-------|---------------------------|-------|
| White blood cell count, G/L |       | Neutrophil count, G/L     |       |
| Lymphocyte count, G/L       |       | Monocyte count, G/L       |       |
| Platelet count, G/L         |       | Red blood cells count T/L |       |
| Haemoglobin, g/L            |       | Prothrombin %             |       |
| Creatinine, µmol/L          |       | Urea mmol/L               |       |
| AST U/L                     |       | ALT U/L                   |       |
| LDH U/L                     |       | CRP mg/L                  |       |
| Sodium (Na+) mmol/L         |       | Potassium (K+) mmol/L     |       |

Sections 1-4 are adapted from the interim case reporting form for 2019 Novel Coronavirus (2019-nCoV) of WHO (World Health Organization)

[https://www.who.int/docs/default-source/coronaviruse/20200121-2019-ncov-reporting-form.pdf?sfvrsn=96eff954\\_4](https://www.who.int/docs/default-source/coronaviruse/20200121-2019-ncov-reporting-form.pdf?sfvrsn=96eff954_4)

\*Sections 5 is added to the WHO CRF to explore more in details the nosocomial risk

Patient – Case Report Form- NOSO-COR project – Version 3\_2020.03.19



**Underlying conditions and comorbidity at admission:** (Please tick all reported)

- Pregnancy (trimester: \_\_\_\_\_)  
 Cardiovascular disease  
 Hypertension  
 Diabetes  
 Liver disease
- Post-partum (< 6 weeks)  
 Immunodeficiency, including HIV  
 Heart failure  
 Renal disease  
 Chronic lung disease  
 Asthma  
 COPD  
 Emphysema  
 Chronic bronchitis
- Chronic neurological or neuromuscular disease  
 Hypothyroidism  
 Other, specify: \_\_\_\_\_
- Malignancy  
 Rheumatic disease

**Smoking status**

- Current smoker  
 Ex-smoker, If Yes, quit date [Y][Y][Y][Y]  
 Never

Alcohol consumption:  Daily  Weekly  Occasionally  Never

**Section 4: Sources of exposure for suspected or confirmed SARS-Cov-2 infected HCP****Information on the unit where nosocomial transmission might have been occurred:**

Number of patients in the unit: \_\_\_\_\_  
 Number of beds in the unit: \_\_\_\_\_  
 Number of probable or confirmed 2019-nCoV patients in contact with the HCP: \_\_\_\_\_  
 Number of beds per room of the infected patient  1  2  Others : \_\_\_\_

**Information on the hospitalization room of SARS-Cov-2 infected patients:**

Closed room: Yes  No   
 Room identified with a warning sticker: Yes  No   
 If yes (Multiple choice):  
 Caution « droplets »  « Caution« contact »  « Caution « air »  « Contact complementary caution »  
 Air conditioner: Yes  No   
 Other aeration: Yes  No   
 If Yes, please detail: \_\_\_\_\_  
 Room with airlock: Yes  No   
 Bio-cleaning: Yes  No   
 Detergent-disinfectant only  Bleach alone 0,5%  Detergent-disinfectant + bleach 0,5%  Others \_\_\_\_\_  
 If Yes, frequency:  Once a day  Every 2 days  Once a week  Others \_\_\_\_\_

**Availability of personal protective equipment *in the ward*:**

Mask fit-tested NIOSH-certified disposable N95: Yes  No  NA   
 Surgical mask: Yes  No  NA   
 Health Care Professional (HCP) – Case Report Form- NOSO-COR project – Version 3\_2020.03.19



Single use Long sleeve over-blouse: Yes  No  NA   
 Protective apron: Yes  No  NA   
 Vinyl gloves (single utilisation) Yes  No  NA   
 Single use nitrile gloves: Yes  No  NA   
 Protective glasses: Yes  No  NA

**Availability of hand rub hydroalcoholic solution *in the unit*:**

Available in the unit: Yes  No   
 If available:  Individual format  in unit's room  in common parts of the unit

**Section 5: Laboratory information**

Nasopharyngeal sample taken: Yes  No  If yes, date: \_\_/\_\_/\_\_ Time (1 to 12):  
 AM (before noon)  
 PM (after noon)

Name of confirming laboratory: \_\_\_\_\_  
 Date of laboratory confirmation: [D][D]/[M][M]/[Y][Y][Y][Y] Time (1 to 12):  
 AM (before noon)  
 PM (after noon)

Please specify which assay was used: \_\_\_\_\_  
**Result:** SARS-CoV-2 positive  SARS-CoV-2 negative  Other respiratory virus tested: Yes  No   
 If Yes, Influenza A (no sub-type)  Influenza A(H1N1) pdm09  Influenza A(H3N2)  Influenza B (no sub-type)  Influenza B/Yamagata  Influenza B/Victoria  RSV  Other virus (\_\_\_\_\_)  No virus   
 Sequencing will be done? Yes  No  Unknown

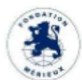

## Hospital characteristics and infection control policies - NOSO-COR project

### Section 1: Administrative data

Name of the hospital:  Country:

Name of the city:  University-affiliated hospital: Yes  No

Number of admissions per year (2018): \_\_\_\_\_ Number of hospitalizations per year (2018): \_\_\_\_\_

### Section 2: Hospital capacities at the time of the survey

| Number (Nb) of adult beds                        | Nb of pediatric beds:                            | Nb of nurses:                                            |
|--------------------------------------------------|--------------------------------------------------|----------------------------------------------------------|
| Nb in medicine units: <input type="text"/>       | Nb in medicine units: <input type="text"/>       | Nb of assistant-nurses: <input type="text"/>             |
| Nb in surgery: <input type="text"/>              | Nb in surgery: <input type="text"/>              | Nb of permanent medical doctors: <input type="text"/>    |
| Nb in obstetrics: <input type="text"/>           | Nb in neonatology: <input type="text"/>          | Nb of lab staff: <input type="text"/>                    |
| Nb in intensive care units: <input type="text"/> | Nb in intensive care units: <input type="text"/> | Nb of administrative staff: <input type="text"/>         |
| Other units: <input type="text"/>                | Other units: <input type="text"/>                | Others (pharmacists, physio, etc.): <input type="text"/> |

### Section 3: Health Care Professionals (HCP)

### Section 3: SARS-Cov-2 local alert

Presence of at least one infection control unit in the hospital: Yes  No

Presence of a validated protocol exist regarding infection control in the hospital: Yes  No

Date of the protocol validation: [D][D]/[M][M]/[Y][Y][Y][Y]

Local guidelines regarding SARS-Cov-2: Airborne precautions  Contact precautions  Droplets precautions

#### For the infected patient:

- Surgical mask if moving: Yes  No  Not applicable
- Isolation: Yes  No  Not applicable
- Mandatory room door closed: Yes  No  Not applicable
- Air conditioning room stopped: Yes  No  Not applicable
- Hand disinfection before moving outside the room: Yes  No  Not applicable
- Cohorting (HCP dedicated for the patient): Yes  No  Not applicable
- Visits restriction: Yes  No  Not applicable

#### For non-infected patients from the same unit as the case:

- Identification of contact patients: Yes  No  Not applicable
- Cohorting (HCP dedicated for the contacts): Yes  No  Not applicable
- Other preventive measures: \_\_\_\_\_

#### For HCP providing care for the infected patient before entrance in the room

- Mask :fit-tested NIOSH-certified disposable N95 filtering facepiece respirator before entrance in the patient room: Yes  No  Not applicable
- Hand disinfection : Yes  No  Not applicable
- Use non sterile gloves: Yes  No  Not applicable
- Wearing gowns : Yes  No  Not applicable
- Eye protection : Yes  No  Not applicable
- Dedicated medical equipment: Yes  No  Not applicable
- Adapted environmental cleaning and disinfection procedures: Yes  No  Not applicable
- Others specific measures : \_\_\_\_\_

Hospital characteristics and infection control policies - NOSO-COR project - Version 2\_2020.02.24
