# Supplementary material for: Protocol for a prospective, observational, hospital-based multicentre study of nosocomial SARS-CoV-2 transmission: NOSO-COR Project
Source: PubMed Central journal article supplement — BMJ Open. 2020 Oct 22;10(10):e039088. doi: 10.1136/bmjopen-2020-039088 (PMC7582335; doi:10.1136/bmjopen-2020-039088), 2020-10-22
Supplement: bmjopen-2020-039088supp001.pdf [file bmjopen-2020-039088supp001.pdf]

## Supplementary material

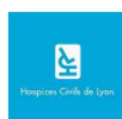

Patient - Case Report Form  
NOSO-COR project  
Version 3

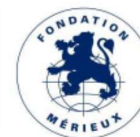

Date of reporting to national health authority: [ ] [ ] [ ] [ ] [ ] [ ] [ ] [ ] [ ] [ ] [ ] [ ] [ ] [ ]  
Reporting institution: \_\_\_\_\_  
Reporting country: \_\_\_\_\_  
Case classification:  Confirmed  Suspected  
Detected at admission  No  Yes  Unknown If yes, date [ ] [ ] [ ] [ ] [ ] [ ] [ ] [ ] [ ] [ ] [ ] [ ] [ ] [ ]

### Section 1: Patient information

Unique Case Identifier (used in country): [ ] [ ] [ ] [ ] [ ] [ ] [ ] [ ] [ ] [ ] [ ] [ ] [ ] [ ]

Date of Birth: [ ] [ ] [ ] [ ] [ ] [ ] [ ] [ ] [ ] [ ] [ ] [ ] or estimated age: [ ] [ ] [ ] in years

if < 1 year old, [ ] [ ] in months or if < 1 month, [ ] [ ] in days

Sex at birth:  Male  Female

Weight (Kg) [ ] [ ] [ ] Height (cm) [ ] [ ] [ ] [ ]

Place where the case was diagnosed: Country: \_\_\_\_\_

Admin Level 1 (province): \_\_\_\_\_ Admin Level 2 (district): \_\_\_\_\_

Patient usual place of residency: Country: \_\_\_\_\_

Admin Level 1 (province): \_\_\_\_\_ Admin Level 2 (district): \_\_\_\_\_

### Section 2: Clinical information

#### Patient clinical course

Date of onset of symptoms: [ ] [ ] [ ] [ ] [ ] [ ] [ ] [ ] [ ] [ ] [ ] [ ] [ ] [ ]  Unknown

Admission to hospital:  No  Yes  Unknown

First date of admission to hospital: [ ] [ ] [ ] [ ] [ ] [ ] [ ] [ ] [ ] [ ] [ ] [ ] [ ] [ ]

Name of hospital: \_\_\_\_\_

Hospitalization in ICU at admission  No  Yes  Unknown

If Yes, date of ICU hospitalization [ ] [ ] [ ] [ ] [ ] [ ] [ ] [ ] [ ] [ ] [ ] [ ] [ ] [ ]

Date of discharge from ICU [ ] [ ] [ ] [ ] [ ] [ ] [ ] [ ] [ ] [ ] [ ] [ ] [ ] [ ]

Hospitalization in ICU during hospital stay  No  Yes  Unknown

If Yes, date of ICU hospitalization during stay [ ] [ ] [ ] [ ] [ ] [ ] [ ] [ ] [ ] [ ] [ ] [ ] [ ] [ ]

Date of discharge from ICU [ ] [ ] [ ] [ ] [ ] [ ] [ ] [ ] [ ] [ ] [ ] [ ] [ ] [ ]

Was the patient ventilated:  No  Yes  Unknown

If Yes, date of start of ventilation [ ] [ ] [ ] [ ] [ ] [ ] [ ] [ ] [ ] [ ] [ ] [ ] [ ] [ ]

Date of end of ventilation [ ] [ ] [ ] [ ] [ ] [ ] [ ] [ ] [ ] [ ] [ ] [ ] [ ] [ ]

Date of discharge from Hospital [ ] [ ] [ ] [ ] [ ] [ ] [ ] [ ] [ ] [ ] [ ] [ ] [ ] [ ]

Date of isolation: [ ] [ ] [ ] [ ] [ ] [ ] [ ] [ ] [ ] [ ] [ ] [ ] [ ] [ ]

Health status (circle) at time of reporting: recovered / not recovered / death / unknown

End date of symptoms: [ ] [ ] [ ] [ ] [ ] [ ] [ ] [ ] [ ] [ ] [ ] [ ] [ ] [ ]  Unknown

Complications after the event:  Cardiac  Respiratory  Death  No complication  
 Unknown  Pulmonary bacterial superinfection  
 Other bacterial superinfection  
 Cardiopulmonary Resuscitation  
 Other: \_\_\_\_\_

Death  No  Yes  Unknown

Date of death, if applicable: [ ] [ ] [ ] [ ] [ ] [ ] [ ] [ ] [ ] [ ] [ ] [ ] [ ] [ ]

Patient – Case Report Form- NOSO-COR project – Version 3\_2020.03.19

**Patient symptoms at admission (for community acquired cases) / at suspicion (for nosocomial cases)**

(check all reported symptoms):

- |                                                    |                                                 |                                                                   |
|----------------------------------------------------|-------------------------------------------------|-------------------------------------------------------------------|
| <input type="checkbox"/> History of fever / chills | <input type="checkbox"/> Shortness of breath    | <input type="checkbox"/> Pain (check all that apply)              |
| <input type="checkbox"/> General weakness          | <input type="checkbox"/> Diarrhoea              | <input type="checkbox"/> Muscular <input type="checkbox"/> Chest  |
| <input type="checkbox"/> Cough                     | <input type="checkbox"/> Nausea/vomiting        | <input type="checkbox"/> Abdominal <input type="checkbox"/> Joint |
| <input type="checkbox"/> Sore throat               | <input type="checkbox"/> Headache               |                                                                   |
| <input type="checkbox"/> Runny nose                | <input type="checkbox"/> Irritability/Confusion |                                                                   |
| <input type="checkbox"/> Anosmia                   | <input type="checkbox"/> Ageusia                |                                                                   |
| <input type="checkbox"/> Other, specify _____      |                                                 |                                                                   |

**Patient signs:**Temperature at admission/at suspicion: [ ] [ ] [ ] °C / ° F Unknown 

Check all observed signs seen at least once during hospitalization:

- |                                                 |                                                     |                                                                      |
|-------------------------------------------------|-----------------------------------------------------|----------------------------------------------------------------------|
| <input type="checkbox"/> Pharyngeal exudate     | <input type="checkbox"/> Coma                       | Lung X-ray: <input type="checkbox"/> Yes <input type="checkbox"/> No |
| <input type="checkbox"/> Conjunctival injection | <input type="checkbox"/> Dyspnoea / tachypnoea      | If Yes: <input type="checkbox"/> Abnormal lung X-ray finding         |
| <input type="checkbox"/> Seizure                | <input type="checkbox"/> Abnormal lung auscultation |                                                                      |
| <input type="checkbox"/> Other, specify: _____  |                                                     |                                                                      |

**Underlying conditions and comorbidity at admission (check all that apply):**

- |                                                                        |                                                          |
|------------------------------------------------------------------------|----------------------------------------------------------|
| <input type="checkbox"/> Pregnancy (trimester: _____)                  | <input type="checkbox"/> Post-partum (< 6 weeks)         |
| <input type="checkbox"/> Cardiovascular disease,                       | <input type="checkbox"/> Immunodeficiency, including HIV |
| <input type="checkbox"/> Hypertension                                  | <input type="checkbox"/> Heart failure                   |
| <input type="checkbox"/> Diabetes                                      | <input type="checkbox"/> Renal disease                   |
| <input type="checkbox"/> Liver disease                                 | <input type="checkbox"/> Chronic lung disease            |
| <input type="checkbox"/> Chronic neurological or neuromuscular disease | <input type="checkbox"/> Asthma                          |
| <input type="checkbox"/> Hypothyroidism                                | <input type="checkbox"/> COPD                            |
| <input type="checkbox"/> Malignancy                                    | <input type="checkbox"/> Emphysema                       |
| <input type="checkbox"/> Rheumatic disease                             | <input type="checkbox"/> Chronic bronchitis              |
| <input type="checkbox"/> Other, specify: _____                         |                                                          |

**Smoking status** Current smoker  Ex-smoker, If Yes, Quit date [ ] [ ] [ ] [ ] [ ] [ ]  Never  Data not availableAlcohol consumption:  Daily  Weekly  Occasionally  Never  Data not available**Section 3: Exposure in the 14 days prior to symptom onset (prior to reporting if asymptomatic)****Occupation:** (tick any that apply)

- |                                               |                                                   |                                                |
|-----------------------------------------------|---------------------------------------------------|------------------------------------------------|
| <input type="checkbox"/> Student              | <input type="checkbox"/> Health care worker       | <input type="checkbox"/> Other, specify: _____ |
| <input type="checkbox"/> Working with animals | <input type="checkbox"/> Health laboratory worker |                                                |

Has the patient visited any health care facility(ies) in the 14 days prior to symptom onset?  No  Yes  UnknownHas the patient had **close contact**<sup>1</sup> with a person with acute respiratory infection in the 14 days prior to symptom onset? No  Yes  Unknown

If yes, contact setting (check all that apply):

- 
- Health care setting
- 
- Family setting
- 
- Work place
- 
- Unknown
- 
- Other, specify: \_\_\_\_\_

Has the patient had contact with a probable or confirmed case in the 14 days prior to symptom onset? :

 No  Yes  Unknown

If yes, please list unique case identifiers of all probable or confirmed cases:

Case 1 identifier: \_\_\_\_\_ Case 2 identifier: \_\_\_\_\_ Case 3 identifier: \_\_\_\_\_

If yes, contact setting (check all that apply):

- 
- Health care setting
- 
- Family setting
- 
- Work place
- 
- Unknown
- 
- Other, specify: \_\_\_\_\_

If yes, location/city/country for exposure: \_\_\_\_\_

Has the patient visited any live animal markets in the 14 days prior to symptom onset?  No  Yes  Unknown

If yes, location/city/country for exposure: \_\_\_\_\_

<sup>1</sup> **Close contact** is defined as:

- Health care associated exposure, including providing direct care to SARS-CoV-2 patients, working with health care workers infected with novel coronavirus, visiting patients or staying in the same close environment of a SARS-CoV-2 patient.
- Working together in close proximity or sharing the same classroom environment with a with a SARS-CoV-2 patient.
- Travelling together with SARS-CoV-2 patient in any kind of conveyance.
- Living in the same household as a SARS-CoV-2 patient

**Patient – Case Report Form- NOSO-COR project – Version 3\_2020.03.19**

**Section 4: Laboratory information**

Nasopharyngeal sample taken: Yes  No  If yes, date: \_\_/\_\_/\_\_\_\_ Time (1 to 12): \_\_\_\_\_  AM (before noon)  
 PM (after noon)

Name of confirming laboratory: \_\_\_\_\_  
 Date of laboratory confirmation: [D][D]/[M][M]/[Y][Y][Y][Y] Time (1 to 12): \_\_\_\_\_  AM (before noon)  
 PM (after noon)

Please specify which assay was used: \_\_\_\_\_  
**Result:** SARS-CoV-2 positive  SARS-CoV-2 negative  Other respiratory virus tested: Yes  No   
 If Yes, Influenza A (no sub-type)  Influenza A(H1N1) pdm09  Influenza A(H3N2)  Influenza B (no sub-type)   
 Influenza B/Yamagata  Influenza B/Victoria  RSV  Other virus (\_\_\_\_\_)  No virus   
 Sequencing done will be?: Yes  No  Unknown

Several nasopharyngeal sample taken during hospitalization: Yes  No   
 If yes, date of first negative test: \_\_/\_\_/\_\_\_\_

**Section 5: Information regarding hospitalization\* (NOSO-COR Project)**

Specificity of the ward at inclusion:  ICU  Surgery  Medicine  Obstetrics  Other: \_\_\_\_\_  
 Number of rooms in the ward; \_\_\_\_\_ Number of beds in the ward: \_\_\_\_\_

ID (or name) of the ward: \_\_\_\_\_ Room N°: \_\_\_\_\_  
 Single room  
 Double room If yes, roommate  Present  Absent  
 More than 2 beds in the room, If yes, number of beds: \_\_\_\_\_ number of present roommate: \_\_\_\_\_

Did the patient move to other type of room during hospitalization?  Yes  No  
 Single room  
 Double room If yes, roommate  Present  Absent  
 More than 2 beds in the room, If yes, number of beds: \_\_\_\_\_ number of present roommate: \_\_\_\_\_

Hygiene prevention measures at entrance of the room:  Yes  No  
 Modification of preventive measures during hospitalization  Yes  No  
 If Yes, please specify \_\_\_\_\_

Does the patient wear a mask when outside of the room for clinical examination or any other reasons?  
 Never  Sometimes  Always

Date admitted to the ward: [D][D]/[M][M]/[Y][Y][Y][Y]  
 Date discharged from the ward: [D][D]/[M][M]/[Y][Y][Y][Y]

**Section 6: Biological parameters**

| Parameter                   | Value | Parameter                 | Value |
|-----------------------------|-------|---------------------------|-------|
| White blood cell count, G/L |       | Neutrophil count, G/L     |       |
| Lymphocyte count, G/L       |       | Monocyte count, G/L       |       |
| Platelet count, G/L         |       | Red blood cells count T/L |       |
| Haemoglobin, g/L            |       | Prothrombin %             |       |
| Creatinine, µmol/L          |       | Urea mmol/L               |       |
| AST U/L                     |       | ALT U/L                   |       |
| LDH U/L                     |       | CRP mg/L                  |       |
| Sodium (Na+) mmol/L         |       | Potassium (K+) mmol/L     |       |

Sections 1-4 are adapted from the interim case reporting form for 2019 Novel Coronavirus (2019-nCoV) of WHO (World Health Organization)

[https://www.who.int/docs/default-source/coronaviruse/20200121-2019-ncov-reporting-form.pdf?sfvrsn=96eff954\\_4](https://www.who.int/docs/default-source/coronaviruse/20200121-2019-ncov-reporting-form.pdf?sfvrsn=96eff954_4)

\*Sections 5 is added to the WHO CRF to explore more in details the nosocomial risk

Patient – Case Report Form- NOSO-COR project – Version 3\_2020.03.19



**Underlying conditions and comorbidity at admission:** (Please tick all reported)

- Pregnancy (trimester: \_\_\_\_\_)  
 Cardiovascular disease  
 Hypertension  
 Diabetes  
 Liver disease
- Post-partum (< 6 weeks)  
 Immunodeficiency, including HIV  
 Heart failure  
 Renal disease  
 Chronic lung disease  
 Asthma  
 COPD  
 Emphysema  
 Chronic bronchitis
- Chronic neurological or neuromuscular disease  
 Hypothyroidism  
 Other, specify: \_\_\_\_\_
- Malignancy  
 Rheumatic disease
- Smoking status
- Current smoker  
 Ex-smoker, If Yes, quit date [Y][Y][Y][Y]  
 Never
- Alcohol consumption:  Daily  Weekly  Occasionally  Never

**Section 4: Sources of exposure for suspected or confirmed SARS-Cov-2 infected HCP****Information on the unit where nosocomial transmission might have been occurred:**

- Number of patients in the unit: \_\_\_\_\_
- Number of beds in the unit: \_\_\_\_\_
- Number of probable or confirmed 2019-nCoV patients in contact with the HCP: \_\_\_\_\_
- Number of beds per room of the infected patient:  1  2  Others: \_\_\_\_

**Information on the hospitalization room of SARS-Cov-2 infected patients:**

- Closed room: Yes  No
- Room identified with a warning sticker: Yes  No
- If yes (Multiple choice):
- Caution « droplets »  « Caution« contact »  « Caution « air »  « Contact complementary caution »
- Air conditioner: Yes  No
- Other aeration: Yes  No
- If Yes, please detail: \_\_\_\_\_
- Room with airlock: Yes  No
- Bio-cleaning: Yes  No
- Detergent-disinfectant only  Bleach alone 0,5%  Detergent-disinfectant + bleach 0,5%  Others \_\_\_\_\_
- If Yes, frequency:  Once a day  Every 2 days  Once a week  Others \_\_\_\_\_

**Availability of personal protective equipment in the ward:**

- Mask fit-tested NIOSH-certified disposable N95: Yes  No  NA
- Surgical mask: Yes  No  NA
- Health Care Professional (HCP) – Case Report Form - NOSO-COR project – Version 3\_2020.03.19

Single use Long sleeve over-blouse: Yes  No  NA

Protective apron: Yes  No  NA

Vinyl gloves (single utilisation): Yes  No  NA

Single use nitrile gloves: Yes  No  NA

Protective glasses: Yes  No  NA

**Availability of hand rub hydroalcoholic solution *in the unit*:**

Available in the unit: Yes  No

If available:  Individual format  in unit's room  in common parts of the unit

**Section 5: Laboratory information**

Nasopharyngeal sample taken: Yes  No  If yes, date: \_\_/\_\_/\_\_\_\_ Time (1 to 12):  
 AM (before noon)  
 PM (after noon)

Name of confirming laboratory: \_\_\_\_\_  
 Date of laboratory confirmation: [D][D]/[M][M]/[Y][Y][Y][Y] Time (1 to 12):  
 AM (before noon)  
 PM (after noon)

Please specify which assay was used: \_\_\_\_\_

**Result:** SARS-CoV-2 positive  SARS-CoV-2 negative  Other respiratory virus tested: Yes  No

If Yes, Influenza A (no sub-type)  Influenza A(H1N1) pdm09  Influenza A(H3N2)  Influenza B (no sub-type)  Influenza B/Yamagata  Influenza B/Victoria  RSV  Other virus (\_\_\_\_\_)  No virus

Sequencing will be done? Yes  No  Unknown



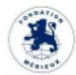

## Hospital characteristics and infection control policies - NOSO-COR project

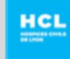

## Section 1: Administrative data

Name of the hospital:  Country:

Name of the city:  University-affiliated hospital: Yes  No

Number of admissions per year (2018):  Number of hospitalizations per year (2018):

## Section 2: Hospital capacities at the time of the survey

| Number (Nb) of adult beds                        | Nb of pediatric beds:                            | Nb of nurses:                       | <input type="text"/> |
|--------------------------------------------------|--------------------------------------------------|-------------------------------------|----------------------|
| Nb in medicine units: <input type="text"/>       | Nb in medicine units: <input type="text"/>       | Nb of assistant-nurses:             | <input type="text"/> |
| Nb in surgery: <input type="text"/>              | Nb in surgery: <input type="text"/>              | Nb of permanent medical doctors:    | <input type="text"/> |
| Nb in obstetrics: <input type="text"/>           | Nb in neonatology: <input type="text"/>          | Nb of lab staff:                    | <input type="text"/> |
| Nb in intensive care units: <input type="text"/> | Nb in intensive care units: <input type="text"/> | Nb of administrative staff:         | <input type="text"/> |
| Other units: <input type="text"/>                | Other units: <input type="text"/>                | Others (pharmacists, physio, etc.): | <input type="text"/> |

## Section 3: Health Care Professionals (HCP)

## Section 3: SARS-Cov-2 local alert

Presence of at least one infection control unit in the hospital: Yes  No

Presence of a validated protocol exist regarding infection control in the hospital: Yes  No

Date of the protocol validation: [D][D][D]/[M][M]/[Y][Y][Y][Y]

Local guidelines regarding SARS-Cov-2: Airborne precautions  Contact precautions  Droplets precautions

For the infected patient:

- Surgical mask if moving: Yes  No  Not applicable
- Isolation: Yes  No  Not applicable
- Mandatory room door closed: Yes  No  Not applicable
- Air conditioning room stopped: Yes  No  Not applicable
- Hand disinfection before moving outside the room: Yes  No  Not applicable
- Cohorting (HCP dedicated for the patient): Yes  No  Not applicable
- Visits restriction: Yes  No  Not applicable

For non-infected patients from the same unit as the case:

- Identification of contact patients: Yes  No  Not applicable
- Cohorting (HCP dedicated for the contacts): Yes  No  Not applicable
- Other preventive measures: \_\_\_\_\_

For HCP providing care for the infected patient before entrance in the room

- Mask :fit-tested NIOSH-certified disposable N95 filtering facepiece respirator before entrance in the patient room: Yes  No  Not applicable
- Hand disinfection : Yes  No  Not applicable
- Use non sterile gloves: Yes  No  Not applicable
- Wearing gowns : Yes  No  Not applicable
- Eye protection : Yes  No  Not applicable
- Dedicated medical equipment: Yes  No  Not applicable
- Adapted environmental cleaning and disinfection procedures: Yes  No  Not applicable
- Others specific measures : \_\_\_\_\_

Hospital characteristics and infection control policies - NOSO-COR project - Version 2\_2020.02.24
